# Supplementary material for: Career Profiles of University Students: How STEM Students Distinguish Regarding Interests, Prestige and Sextype
Source: MDPI journal article supplement (doi:10.3390/educsci13030324), 2023-03-22
Supplement: s1 [file s1]

**Supplementary Table S1.** Means, Standard Deviations and Reliability amongst Characterization and Validation Variables

|                                                  | <i>Mean</i> | <i>SD</i> | <i>Min-Max</i>      | <i>Wave</i> | <i>No. Items</i>        | <i>Reliability</i> | <i>Example item</i>                                                                                         | <i>Author</i>                                          |
|--------------------------------------------------|-------------|-----------|---------------------|-------------|-------------------------|--------------------|-------------------------------------------------------------------------------------------------------------|--------------------------------------------------------|
| <i>Congruence</i>                                | 0.81        | 0.32      | 4 - 0*              | 1           | -                       | n/a                | -                                                                                                           | Holland (1997); Ertl & Hartmann (2019)                 |
| <i>Prestige</i>                                  | 135.9       | 27.0      | 20 - 187            | 1           | -                       | n/a                | -                                                                                                           | Christoph (2005)                                       |
| <i>Same-Sex Proportion</i>                       | 0.61        | 0.21      | 0 - 1               | 1           | -                       | n/a                | -                                                                                                           | -                                                      |
| <i>Study Outcome Expectation</i>                 | 4.39        | 0.65      | 1 - 5               | 1           | 1                       | n/a                | "How likely is it for you to successfully complete a course of study"                                       | Esser & Stocké (2003)                                  |
| <i>Chances for getting a good job</i>            | 4.14        | 0.78      | 1 - 5               | 1           | 1                       | n/a                | "Once you do complete the degree course successfully, what are your chances of getting a good job?"         | Esser & Stocké (2003)                                  |
| <i>Status Maintenance (Both Parents)</i>         | 2.81        | 1.34      | 1 - 5               | 1           | 2 (1 each) <sup>†</sup> | 0.88               | "How important is it to you to have a job one day that is as good as or better than that of your [parent]?" | Stocké (2005)                                          |
| <i>Intention to Dropout</i>                      | 1.48        | 0.58      | 1 - 5               | 2           | 5                       | 0.85               | "I have often thought about quitting my studies"                                                            | Trautwein, Köller & Watermann (2004)                   |
| <i>Study Satisfaction [A]</i>                    |             |           |                     |             |                         |                    |                                                                                                             | Westermann et al. (1996)                               |
| - <i>Study content</i>                           | 7.75        | 1.57      | 1 - 10              | 3           | 3                       | 0.88               | "I really enjoy the subject I'm studying"                                                                   | Westermann et al. (1996)                               |
| - <i>Study conditions</i>                        | 4.91        | 2.13      | 1 - 10 <sup>§</sup> | 3           | 3                       | 0.75               | "I wish that the study conditions at the higher education institution were better" (r)                      | Westermann et al. (1996)                               |
| - <i>Coping with study burdens</i>               | 5.83        | 2.08      | 1 - 10 <sup>¶</sup> | 3           | 3                       | 0.78               | "My course of study is wearing me down" (r)                                                                 | Westermann et al. (1996)                               |
| <i>Gender Role Attitude</i>                      | 3.27        | 0.41      | 1-4                 | 4           | 8                       | 0.71               | "The man's job is to earn money; the woman's job is to take care of the household and family."              | Athenstaedt (2000);<br>Deutsches Jugendinstitut (2001) |
| <i>Study Outcomes</i>                            | -           | -         | -                   | Episodes    | -                       | -                  | -                                                                                                           | Ertl, Hartmann & Wunderlich (2022)                     |
| <i>Standardized Grades at the end of studies</i> | -0.02       | 0.99      | -                   | Episodes    | -                       | -                  | -                                                                                                           | Ertl, Hartmann & Wunderlich (2022)                     |

*Note.* SD = Standard deviation; Min-Max = Range of the scale, Reliability = Cronbach's alpha; (r) = reverse coded items; n/a = Not available. Wave 1 = between Winter Semester 2010 until the end of 2011, Wave 2 = Winter Semester 2011, Wave 3 = Summer Semester 2012. Episodes = Units of life history recorded during interviews. \*Congruence is reversed coded to allow for a higher congruence (i.e. 0) to correlate to a higher prestige. <sup>†</sup>To avoid issues with multicollinearity this study uses an aggregate score for the status maintenance of both parents; <sup>§</sup> Better study conditions signified by higher scores (i.e. 10); <sup>¶</sup>Coping better with study burdens signified by higher scores (i.e. 10).

**Supplementary Table S2.** Latent Profile Model Fit Information for the Selection of Career Profiles (n=9277)

| #         | LL                | AIC              | BIC              | SABIC            | BLRT( <i>p</i> ) | LMR( <i>p</i> ) | Entropy      | Repl.      | Largest class       |
|-----------|-------------------|------------------|------------------|------------------|------------------|-----------------|--------------|------------|---------------------|
| 3         | -37717.991        | 75463.982        | 75563.876        | 75519.386        | 0.0000           | 0.0000          | 0.749        | Yes        | 6183 (66.6%)        |
| 4         | -37105.618        | 74247.236        | 74375.671        | 74318.470        | 0.0000           | 0.0000          | 0.908        | Yes        | 5123 (55.2%)        |
| 5         | -35686.119        | 71356.239        | 71513.215        | 71443.303        | 0.0000           | 0.0000          | 0.970        | Yes        | 4748 (51.1%)        |
| 6         | -35543.671        | 69139.341        | 69324.859        | 69242.235        | 0.0000           | 0.0000          | 0.982        | Yes        | 4570 (49.3%)        |
| 7         | -32925.855        | 65911.710        | 66125.769        | 66030.433        | 0.0000           | 0.0000          | 0.991        | Yes        | 4543 (49.0%)        |
| 8         | -32091.826        | 64251.652        | 64494.252        | 64386.206        | 0.0000           | 0.0000          | 0.995        | No         | 4235 (45.7%)        |
| 9         | -31249.321        | 62574.641        | 62845.782        | 62725.025        | 0.0000           | 0.0000          | 0.985        | Yes        | 4235 (45.7%)        |
| 10        | -30624.200        | 61332.399        | 61632.082        | 61498.612        | 0.0000           | 0.0000          | 0.984        | Yes        | 4022 (43.3%)        |
| <b>11</b> | <b>-30146.962</b> | <b>60385.925</b> | <b>60714.148</b> | <b>60567.967</b> | <b>0.0000</b>    | <b>0.0000</b>   | <b>0.986</b> | <b>Yes</b> | <b>4021 (43.3%)</b> |
| 12        | -29929.219        | 59952.437        | 60309.202        | 60150.310        | 0.0000           | 0.0226          | 0.983        | No         | 4021 (43.3%)        |
| 13        | -29666.737        | 59441.473        | 59826.779        | 59826.779        | 0.0000           | 0.0178          | 0.986        | No         | 4021 (43.3%)        |
| 14        | -29415.295        | 58946.590        | 59360.437        | 59176.123        | 0.0000           | 0.1481          | 0.947        | No         | 3443 (37.1%)        |
| 15        | -28881.481        | 57886.962        | 58329.350        | 58132.324        | 1.0000           | 0.8406          | 0.970        | No         | 4021 (43.3%)        |
| 16        | -28919.759        | 57971.519        | 58442.448        | 58232.711        | 1.0000           | 1.0000          | 0.978        | No         | 3158 (34.0%)        |
| 17        | -28349.761        | 56839.522        | 57338.993        | 57116.544        | 1.0000           | 0.9903          | 0.957        | No         | 3838 (41.4%)        |
| 18        | -28225.595        | 56599.189        | 57127.201        | 56892.041        | 1.0000           | 0.9581          | 0.984        | No         | 3137 (33.8%)        |
| 19        | -27959.679        | 56075.358        | 56631.911        | 56384.040        | 1.0000           | 0.9208          | 0.985        | No         | 3135 (33.8%)        |
| 20        | -27804.475        | 55772.950        | 56385.044        | 56097.461        | 1.0000           | 0.9995          | 0.916        | No         | 3114 (33.6%)        |

Note. LL = Log likelihood, AIC = Akaike Information Criterion, BIC = Bayesian Information Criterion, SABIC = Sample-adjusted Bayesian Information Criterion, BLRT(*p*) = *p*-value for the Bootstrapped Likelihood Ratio Test, LMR(*p*) = *p*-value for the Lo-Mendell-Rubin, Repl. = Log likelihood replicated more than five times.

**Supplementary Table S3** Correlation matrix of Career Choice Dimensions and other Characterization Variables for the whole sample (sex-combined)

| <i>Factors</i>                        | <i>Congruence</i> | <i>Prestige</i> | <i>Female Prop.</i> | <i>Outcome Expectation</i> | <i>Chances for getting a good job</i> | <i>Status M. Parents</i> |
|---------------------------------------|-------------------|-----------------|---------------------|----------------------------|---------------------------------------|--------------------------|
| <i>Congruence</i>                     | -                 |                 |                     |                            |                                       |                          |
| <i>Prestige</i>                       | .067***           | -               |                     |                            |                                       |                          |
| <i>Female Proportion</i>              | 0.203***          | 0.172***        | -                   |                            |                                       |                          |
| <i>Outcome Expectation</i>            | 0.067***          | 0.044***        | 0.008               | -                          |                                       |                          |
| <i>Chances for getting a good job</i> | -0.123***         | 0.056***        | -0.285***           | 0.091***                   | -                                     |                          |
| <i>Status M. Parents</i>              | -0.024*           | -0.057***       | -0.128***           | -0.015                     | 0.029**                               | -                        |

*Note.* n = 9091, Female Prop. = Proportion of Females in the Aspired Occupation which is adapted from the Same-Sex Proportion (SSP) variable. Status M Parents = Importance of Status Maintenance of Parents; The correlation matrix uses the original and unstandardized scales. Congruence is reversed coded to allow for a higher congruence to correlate to a higher prestige and higher SSP. Correlations are calculated with Spearman's rho. \* $p < .05$ ; \*\* $p < .01$ ; \*\*\* $p < .001$ .

**Supplementary Table S4.** Correlations amongst Career Choice Dimensions and other Characterization Variables for sex-separated samples (upper triangle female; lower triangle male)

| <i>Factors</i>                        | <i>Congruence</i> | <i>Prestige</i> | <i>Female Prop.</i> | <i>Outcome Expectation</i> | <i>Chances for getting a good job</i> | <i>SM. Parents</i> |
|---------------------------------------|-------------------|-----------------|---------------------|----------------------------|---------------------------------------|--------------------|
| <i>Congruence</i>                     | -                 | -0.024          | -.201***            | -.065***                   | 0.102***                              | .0038**            |
| <i>Prestige</i>                       | -0.045***         | -               | -.167***            | .035**                     | 0.183***                              | -0.029*            |
| <i>Female Prop.</i>                   | -0.048**          | 0.455***        | -                   | .006                       | -0.197***                             | -0.123***          |
| <i>Outcome Expectation</i>            | -0.069***         | 0.047**         | .016                | -                          | 0.116***                              | -0.029*            |
| <i>Chances for getting a good job</i> | 0.039*            | -0.012          | -0.186***           | .063***                    | -                                     | 0.015              |
| <i>SM. Parents</i>                    | -0.008            | -0.09***        | -.130***            | 0.007                      | 0.037*                                | -                  |

Note. Male  $n = 3523$ , Female  $n = 5568$ , Whole sample  $n = 9091$ , Female Prop. = Proportion of Females in the Aspired Occupation which is adapted for the Same-Sex Proportion (SSP) variable. SM Parents = Importance of Status Maintenance Parents; The correlation matrix uses the original and unstandardized scales. Congruence is reversed coded to allow for a higher congruence to correlate to a higher prestige and higher SSP. Correlations are calculated with Spearman's rho; \* $p < .05$ ; \*\* $p < .01$ ; \*\*\* $p < .001$ .

**Supplementary Table S5.** Descriptive Statistics: Sex ratio, Age and Study Fields of Career Profiles (n=9277)

|                                     | P1<br>(n = 149) | P2<br>(n = 397) | P3<br>(n = 288) | P4<br>(n = 414) | P5<br>(n = 652) | P6<br>(n = 608) | P7<br>(n = 157) | P8<br>(n = 718) | P9<br>(n = 4021) | P10<br>(n = 1565) | P11<br>(n = 308) | Total         |
|-------------------------------------|-----------------|-----------------|-----------------|-----------------|-----------------|-----------------|-----------------|-----------------|------------------|-------------------|------------------|---------------|
| <b><i>Females in Profile</i></b>    |                 |                 |                 |                 |                 |                 |                 |                 |                  |                   |                  |               |
| <i>n (%)</i>                        | 57<br>(38%)     | 210<br>(53%)    | 167<br>(58%)    | 364<br>(88%)    | 473<br>(73%)    | 261<br>(43%)    | 41<br>(26%)     | 489<br>(68%)    | 2982<br>(74%)    | 480<br>(31%)      | 155<br>(50%)     | 5679<br>(61%) |
| <b><i>Age at start of panel</i></b> |                 |                 |                 |                 |                 |                 |                 |                 |                  |                   |                  |               |
| <i>Mean (SD)</i>                    | 21.0<br>(1.8)   | 20.2<br>(1.5)   | 20.9<br>(2.0)   | 20.7<br>(1.9)   | 21.2<br>(2.1)   | 20.8<br>(1.9)   | 21.1<br>(1.9)   | 20.6<br>(2.2)   | 20.5<br>(1.7)    | 20.5<br>(1.6)     | 20.7<br>(1.7)    | 20.6<br>(1.8) |
| <b><i>Study Clusters</i></b>        |                 |                 |                 |                 |                 |                 |                 |                 |                  |                   |                  |               |
| <i>n [Column %]</i>                 |                 |                 |                 |                 |                 |                 |                 |                 |                  |                   |                  |               |
| <i>STEM-L</i>                       | 99<br>[66]      | 116<br>[29]     | 95<br>[33]      | 173<br>[42]     | 97<br>[15]      | 318<br>[52]     | 116<br>[73]     | 27<br>[4]       | 210<br>[5]       | 833<br>[53]       | 97<br>[31]       | 2181          |
| <i>STEM-M</i>                       | 13<br>[9]       | 240<br>[60]     | 29<br>[10]      | 67<br>[16]      | 46<br>[8]       | 46<br>[8]       | 7<br>[4]        | 79<br>[11]      | 1326<br>[33]     | 229<br>[15]       | 128<br>[42]      | 2210          |
| <i>Medicine</i>                     | 30<br>[1]       | 1<br>[<1]       | 1<br>[<1]       | 1<br>[<1]       | -               | 1<br>[<1]       | -               | 576<br>[80]     | 6<br>[<1]        | 2<br>[<1]         | 31<br>[10]       | 623           |
| <i>Economics</i>                    | 27<br>[18]      | 37<br>[9]       | 144<br>[50]     | 139<br>[34]     | 125<br>[19]     | 66<br>[11]      | 19<br>[12]      | 8<br>[1]        | 386<br>[10]      | 201<br>[13]       | 15<br>[5]        | 1167          |
| <i>Education</i>                    | 1<br>[<1]       | 1<br>[<1]       | 6<br>[2]        | 10<br>[2]       | 341<br>[52]     | 17<br>[3]       | 6<br>[4]        | 11<br>[2]       | 399<br>[10]      | 19<br>[1]         | 11<br>[4]        | 822           |
| <i>Language</i>                     | 8<br>[5]        | 2<br>[<1]       | 13<br>[5]       | 24<br>[6]       | 43<br>[7]       | 160<br>[26]     | 9<br>[6]        | 17<br>[2]       | 1694<br>[42]     | 281<br>[18]       | 26<br>[8]        | 2277          |

**Supplementary Table S6.** Descriptive Statistics: Study Cluster and Sex Interaction by Career Profile ( $n=9277$ )

|                         | P1  | P2         | P3         | P4         | P5         | P6         | P7  | P8         | P9          | P10        | P11 | Total |
|-------------------------|-----|------------|------------|------------|------------|------------|-----|------------|-------------|------------|-----|-------|
| <i>STEM-L*Male</i>      | 76  | 79         | 73         | 15         | 72         | <b>275</b> | 102 | 11         | 152         | <b>820</b> | 72  | 1747  |
| <i>STEM-L*Female</i>    | 23  | 37         | 22         | <b>158</b> | 25         | 43         | 14  | 16         | <b>58</b>   | 13         | 25  | 434   |
| <i>STEM-M*Male</i>      | 4   | <b>95</b>  | 7          | 19         | 19         | 14         | 3   | 23         | <b>406</b>  | 67         | 59  | 716   |
| <i>STEM-M*Female</i>    | 9   | <b>145</b> | 22         | 48         | 27         | 32         | 4   | 56         | <b>920</b>  | <b>162</b> | 69  | 1494  |
| <i>Medicine*Male</i>    | -   | 1          | 1          | 1          | -          | 1          | -   | <b>183</b> | -           | 2          | 8   | 194   |
| <i>Medicine*Female</i>  | 1   | 1          | 1          | 1          | -          | -          | -   | <b>393</b> | 6           | -          | 23  | 426   |
| <i>Economics*Male</i>   | 12  | 12         | 41         | 3          | 47         | 26         | 10  | 3          | <b>133</b>  | <b>188</b> | 5   | 480   |
| <i>Economics*Female</i> | 15  | 25         | <b>103</b> | <b>136</b> | <b>78</b>  | 40         | 9   | 5          | <b>253</b>  | 13         | 10  | 687   |
| <i>Education*Male</i>   | -   | -          | -          | 2          | <b>31</b>  | 4          | 1   | 3          | <b>53</b>   | -          | 3   | 97    |
| <i>Education*Female</i> | 1   | 1          | 6          | 8          | <b>310</b> | 13         | 5   | 8          | <b>346</b>  | 19         | 8   | 725   |
| <i>Language*Male</i>    | -   | 1          | -          | 11         | 10         | 27         | -   | 6          | <b>295</b>  | 8          | 6   | 364   |
| <i>Language*Female</i>  | 8   | 1          | 13         | 13         | 33         | 133        | 9   | 11         | <b>1399</b> | <b>273</b> | 20  | 1913  |
| Total                   | 149 | 397        | 288        | 414        | 652        | 608        | 157 | 718        | 4021        | 1565       | 308 | 9277  |

Note. Gray values represent less than 5% of the subject\*sex subsample, bold values more than 10%.

**Supplementary Table S7.** Crosstabulation of Females and Whole Sample Career Profiles

|                                        |     | Female Sample Career Profiles |     |     |     |     |     |     |    |     |      |     |       |
|----------------------------------------|-----|-------------------------------|-----|-----|-----|-----|-----|-----|----|-----|------|-----|-------|
|                                        |     | F1                            | F2  | F3  | F4  | F5  | F6  | F7  | F8 | F9  | F10  | F11 | Total |
| Low Prestige Technical Aspirations     | P1  | 52                            | -   | 1   | -   | -   | -   | 4   | -  | -   | -    | -   | 57    |
| Natural Science Aspirations            | P2  | -                             | -   | -   | 208 | -   | -   | -   | -  | -   | 2    | -   | 210   |
| Low Prestige Economic Aspirations      | P3  | -                             | -   | 167 | -   | -   | -   | -   | -  | -   | -    | -   | 167   |
| Low Same-sex Aspirations               | P4  | -                             | -   | -   | 72  | -   | -   | -   | -  | -   | -    | 292 | 364   |
| Low Prestige Social Aspirations        | P5  | -                             | -   | -   | -   | -   | -   | 473 | -  | -   | -    | -   | 473   |
| Less Distinguish. Aspirations          | P6  | -                             | -   | -   | -   | 261 | -   | -   | -  | -   | -    | -   | 261   |
| Low Prestige High Same-sex Aspirations | P7  | -                             | -   | -   | -   | -   | -   | -   | 41 | -   | -    | -   | 41    |
| High Prestige Medical Aspirations      | P8  | -                             | -   | -   | -   | -   | -   | -   | -  | 489 | -    | -   | 489   |
| Teaching Aspirations                   | P9  | -                             | -   | -   | -   | -   | -   | -   | -  | -   | 2982 | -   | 2982  |
| High Same-sex Aspirations              | P10 | -                             | 460 | -   | 11  | -   | -   | -   | -  | -   | -    | 9   | 480   |
| Academic-Research Aspirations          | P11 | -                             | -   | -   | -   | -   | 155 | -   | -  | -   | -    | -   | 155   |
| Total                                  |     | 52                            | 460 | 168 | 291 | 261 | 155 | 477 | 41 | 489 | 2984 | 301 | 5679  |

**Supplementary Table S8.** Crosstabulation of Whole Sample Career Profiles (P11) with Males Sample Career Profiles

|                                        |     | Male Sample Career Profiles |      |     |     |     |     |     |     |     |     |     |       |
|----------------------------------------|-----|-----------------------------|------|-----|-----|-----|-----|-----|-----|-----|-----|-----|-------|
|                                        |     | M1                          | M2   | M3  | M4  | M5  | M6  | M7  | M8  | M9  | M10 | M11 | Total |
| Low Prestige Technical Aspirations     | P1  | -                           | -    | -   | 1   | -   | -   | -   | 3   | -   | 88  | -   | 92    |
| Natural Science Aspirations            | P2  | -                           | 8    | -   | -   | -   | -   | -   | -   | -   | -   | 179 | 187   |
| Low Prestige Economic Aspirations      | P3  | -                           | -    | -   | -   | -   | -   | -   | 121 | -   | -   | -   | 121   |
| Low Same-sex Aspirations               | P4  | -                           | -    | 50  | -   | -   | -   | -   | -   | -   | -   | -   | 50    |
| Low Prestige Social Aspirations        | P5  | -                           | -    | -   | 166 | -   | -   | -   | -   | -   | 13  | -   | 179   |
| Less Distinguish Aspirations           | P6  | -                           | -    | -   | -   | -   | -   | 347 | -   | -   | -   | -   | 347   |
| Low Prestige High Same-sex Aspirations | P7  | 5                           | -    | -   | -   | 111 | -   | -   | -   | -   | -   | -   | 116   |
| High Prestige Medical Aspirations      | P8  | -                           | -    | -   | -   | -   | -   | -   | -   | 229 | -   | -   | 229   |
| Teaching Aspirations                   | P9  | -                           | 1039 | -   | -   | -   | -   | -   | -   | -   | -   | -   | 1039  |
| High Same-sex Aspirations              | P10 | -                           | -    | 888 | -   | -   | -   | -   | -   | -   | -   | 197 | 1085  |
| Academic-Research Aspirations          | P11 | -                           | -    | -   | -   | -   | 153 | -   | -   | -   | 5   | -   | 153   |
| Total                                  |     | 5                           | 1047 | 938 | 167 | 111 | 153 | 347 | 124 | 229 | 101 | 376 | 3598  |



**Supplementary Table S9.** Cross-tabulated Distribution of Whole and Sex-Separated Profiles ( $n=9277$ )

| P11 - Whole Sample Profiles |                                               |          |              | Distribution of Sex-Separated Profiles      |                                     |
|-----------------------------|-----------------------------------------------|----------|--------------|---------------------------------------------|-------------------------------------|
| #                           | Profile Label                                 | <i>n</i> | % of Females | F11 - Female Profiles ( <i>n</i> , %)       | M11 - Male Profiles ( <i>n</i> , %) |
| P1                          | Low Prestige                                  | 149      | 38%          | F1 (52, 91%)                                | M10 (88, 96%)                       |
|                             | Technical                                     |          |              | F7 (3, 7%)                                  | M8 (3, 3%);                         |
|                             | Aspirations                                   |          |              | F3 (1, >1%)                                 | M4 (1, >1%);                        |
| P2                          | Natural Science                               | 397      | 53%          | F4 (208, 99%)                               | M11 (179, 96%)                      |
|                             | Aspirations                                   |          |              | F10 (2, >1%)                                | M2 (8, 4%);                         |
| P3                          | Low Prestige<br>Economic<br>Aspirations       | 288      | 58%          | F3 (167, 100%)                              | M8 (121, 100%)                      |
| P4                          | Low Same-sex<br>Aspirations                   | 414      | 88%          | F11 (292, 80%)<br>F4 (72, 20%);             | M3 (50, 100%)                       |
| P5                          | Low Prestige<br>Social<br>Aspirations<br>Less | 652      | 73%          | F7 (473, 100%)                              | M4 (166, 93%);<br>M10 (13, 7%)      |
| P6                          | Distinguish.<br>Aspirations                   | 608      | 43%          | F5 (261, 100%)                              | M7 (347, 100%)                      |
| P7                          | Low Prestige<br>High Same-sex<br>Aspirations  | 157      | 26%          | F8 (41, 100%)                               | M5 (111, 96%);<br>M1 (5, 4%)        |
| P8                          | High Prestige<br>Medical<br>Aspirations       | 718      | 68%          | F9 (489, 100%)                              | M9 (229, 100%)                      |
| P9                          | Teaching<br>Aspirations                       | 4021     | 74%          | F10 (2982, 100%)                            | M2 (1039, 100%);                    |
| P10                         | High Same-sex<br>Aspirations                  | 1565     | 31%          | F2 (460, 96%)<br>F4 (11, 2%)<br>F11 (9, 2%) | M3 (888, 82%);<br>M11 (197, 18%)    |
| P11                         | Academic-<br>Research<br>Aspirations          | 308      | 50%          | F6 (155, 100%)                              | M6 (153, 100%)                      |

**Supplementary Table S10.** Career Profile Labels according to Career Choice Dimension Levels

|                                                                                           | P1<br>(n = 149)                          | P2<br>(n = 397)                   | P3<br>(n = 288)                            | P4<br>(n = 414)                    | P5<br>(n = 652)                          | P6<br>(n = 608)                     | P7<br>(n = 157)                    | P8<br>(n = 718)                            | P9<br>(n = 4021)            | P10<br>(n = 1565)                  | P11<br>(n = 308)                     |
|-------------------------------------------------------------------------------------------|------------------------------------------|-----------------------------------|--------------------------------------------|------------------------------------|------------------------------------------|-------------------------------------|------------------------------------|--------------------------------------------|-----------------------------|------------------------------------|--------------------------------------|
| <b><i>Career Profile Labels</i></b>                                                       | Low Prestige<br>Technical<br>Aspirations | Natural<br>Science<br>Aspirations | Low<br>Prestige<br>Economic<br>Aspirations | Low<br>Sextype<br>Aspirations      | Low<br>Prestige<br>Social<br>Aspirations | Less<br>Distinguish.<br>Aspirations | Low<br>Prestige<br>High<br>Sextype | High<br>Prestige<br>Medical<br>Aspirations | Teaching<br>Aspirations     | High<br>Sextype<br>Aspirations     | Academic-<br>Research<br>Aspirations |
| <b><i>Career Choice Dimensions Levels</i></b>                                             |                                          |                                   |                                            |                                    |                                          |                                     |                                    |                                            |                             |                                    |                                      |
| <i>Interest</i>                                                                           | Clear Below                              | Below                             | Below                                      | Below                              | Above                                    | Above                               | Clear Below                        | Above                                      | Average                     | Average                            | Below                                |
| <i>Congruence</i>                                                                         | Average                                  | Average                           | Average                                    | Average                            | Average                                  | Average                             | Average                            | Average                                    |                             |                                    | Average                              |
| <i>Prestige</i>                                                                           | <b>Low</b>                               | Above<br>Average                  | <b>Low</b>                                 | Below<br>Average                   | <b>Low</b>                               | Clear Below<br>Average              | <b>Low</b>                         | <b>High</b>                                | Above<br>Average            | Below<br>Average                   | Clear<br>Above<br>Average            |
| <i>Same-sex<br/>Proportion</i>                                                            | Above<br>Neutral                         | Above<br>Neutral                  | Above<br>Neutral                           | <b>Low</b>                         | Above<br>Neutral                         | Above<br>Neutral                    | <b>High</b>                        | Neutral                                    | Above<br>Neutral            | <b>High</b>                        | Neutral                              |
| <b><i>Career Choice Dimension Means, Standard Deviations and Confidence Intervals</i></b> |                                          |                                   |                                            |                                    |                                          |                                     |                                    |                                            |                             |                                    |                                      |
| <i>Interest</i>                                                                           | 1.11 (.32)                               | 0.91 (0.28)                       | 0.94 (0.37)                                | 0.90 (0.33)                        | 0.72 (0.35)                              | 0.74 (0.38)                         | 1.09 (0.33)                        | 0.66 (0.24)                                | 0.82 (0.30)                 | 0.80 (0.32)                        | 0.87 (0.35)                          |
| <i>Congruence</i>                                                                         | [1.16; 1.06]                             | [0.95; 0.89]                      | [0.98; 0.89]                               | [0.94; 0.87]                       | [0.75; 0.70]                             | [0.77; 0.71]                        | [1.14; 1.04]                       | [0.68; 0.65]                               | [0.83; 0.81]                | [0.82; 0.79]                       | [0.92; 0.84]                         |
| <i>Prestige</i>                                                                           | <b>80 (2.6)</b><br>[80; 81]              | 140 (2.2)<br>[140; 140]           | <b>70 (3.3)</b><br>[70; 71]                | 130 (2.8)<br>[130; 130]            | <b>92 (3.3)</b><br>[92; 92]              | <b>114 (2.3)</b><br>[114; 114]      | <b>49 (5.7)</b><br>[48; 50]        | <b>179 (1.7)</b><br>[179; 179]             | 149 (0.8)<br>[149; 149]     | 130 (2.6)<br>[130; 130]            | 160 (0.3)<br>[160; 160]              |
| <i>Same-Sex<br/>Proportion</i>                                                            | 0.64 (0.31)<br>[0.59; 0.69]              | 0.55 (0.21)<br>[0.53; 0.57]       | 0.59 (0.20)<br>[0.57; 0.62]                | <b>0.25 (0.14)</b><br>[0.24; 0.26] | 0.65 (0.18)<br>[0.64; 0.67]              | 0.65 (0.25)<br>[0.63; 0.67]         | <b>0.73 (0.28)</b><br>[0.69; 0.77] | 0.51 (0.09)<br>[0.50; 0.52]                | 0.57 (0.15)<br>[0.57; 0.58] | <b>0.85 (0.12)</b><br>[0.84; 0.86] | 0.53 (0.15)<br>[0.51; 0.55]          |

*Note.* Means are indicated followed by standard deviation in brackets “()”. Below the mean and standard deviation are the upper and lower confidence intervals in square brackets “[]”. Same-Sex Proportion is in bold (i.e. high/low) if it is outside of the typical/neutral range of .3 to .7. Interest congruence is bold if outside of +1 standard deviation (SD) [1.14 -0.49], and Prestige is bold if outside of +1 SD [109-163].

**Supplementary Table S11.** Matrix of Effect Size Comparisons amongst Career Profiles based on Interest Congruence

|              |                 |          |           | Career Profile | <i>P1</i> | <i>P2</i> | <i>P3</i> | <i>P4</i> | <i>P5</i> | <i>P6</i> | <i>P7</i> | <i>P8</i> | <i>P9</i> | <i>P10</i> | <i>P11</i> | <i>Total</i> |
|--------------|-----------------|----------|-----------|----------------|-----------|-----------|-----------|-----------|-----------|-----------|-----------|-----------|-----------|------------|------------|--------------|
|              |                 |          |           | <i>n</i>       | 149       | 397       | 288       | 414       | 652       | 608       | 157       | 718       | 4021      | 1565       | 308        | 9277         |
|              |                 |          |           | <b>M</b>       | 1.11      | 0.91      | 0.94      | 0.90      | 0.72      | 0.74      | 1.09      | 0.66      | 0.82      | 0.80       | 0.87       | 0.81         |
| <b>#</b>     | <b><i>n</i></b> | <b>M</b> | <b>SD</b> | <b>SD</b>      | 0.32      | 0.28      | 0.37      | 0.37      | 0.35      | 0.38      | 0.33      | 0.24      | 0.30      | 0.32       | 0.35       | 0.32         |
| <i>P1</i>    | 149             | 1.11     | 0.32      |                | -         |           |           |           |           |           |           |           |           |            |            |              |
| <i>P2</i>    | 397             | 0.91     | 0.28      |                | 0.686     | -         |           |           |           |           |           |           |           |            |            |              |
| <i>P3</i>    | 288             | 0.94     | 0.37      |                | 0.481     | -0.093    | -         |           |           |           |           |           |           |            |            |              |
| <i>P4</i>    | 414             | 0.90     | 0.37      |                | 0.587     | 0.030     | 0.108     | -         |           |           |           |           |           |            |            |              |
| <i>P5</i>    | 652             | 0.72     | 0.35      |                | 1.132     | 0.584     | 0.618     | 0.503     | -         |           |           |           |           |            |            |              |
| <i>P6</i>    | 608             | 0.74     | 0.38      |                | 1.003     | 0.494     | 0.531     | 0.426     | -0.055    | -         |           |           |           |            |            |              |
| <i>P7</i>    | 157             | 1.09     | 0.33      |                | 0.062     | -0.610    | -0.421    | -0.529    | -1.069    | -0.945    | -         |           |           |            |            |              |
| <i>P8</i>    | 718             | 0.66     | 0.24      |                | 1.761     | 0.981     | 0.988     | 0.816     | 0.202     | 0.256     | 1.664     | -         |           |            |            |              |
| <i>P9</i>    | 4021            | 0.82     | 0.30      |                | 0.964     | 0.302     | 0.393     | 0.260     | -0.325    | -0.257    | 0.896     | -0.549    | -         |            |            |              |
| <i>P10</i>   | 1565            | 0.80     | 0.32      |                | 0.969     | 0.352     | 0.426     | 0.302     | -0.243    | -0.178    | 0.904     | -0.471    | 0.065     | -          |            |              |
| <i>P11</i>   | 308             | 0.87     | 0.35      |                | 0.705     | 0.128     | 0.195     | 0.083     | -0.429    | -0.351    | 0.641     | -0.756    | -0.165    | -0.215     | -          |              |
| <b>Total</b> | 9277            | 0.81     | 0.32      |                |           |           |           |           |           |           |           |           |           |            |            |              |

Note. *n* = sample size; M = mean; SD = Standard deviation. Effect sizes measure using Cohen's *d*.

**Supplementary Table S12.** Matrix of Effect Size Comparisons amongst Career Profiles based on the Magnitude Prestige Scale

| Career Profile |          |          |           | <i>P1</i>            | <i>P2</i> | <i>P3</i> | <i>P4</i> | <i>P5</i> | <i>P6</i> | <i>P7</i> | <i>P8</i> | <i>P9</i> | <i>P10</i> | <i>P11</i> | <i>Total</i> |    |
|----------------|----------|----------|-----------|----------------------|-----------|-----------|-----------|-----------|-----------|-----------|-----------|-----------|------------|------------|--------------|----|
| <i>n</i>       |          |          |           | 149                  | 397       | 288       | 414       | 652       | 608       | 157       | 718       | 4021      | 1565       | 308        | 9277         |    |
| <i>M</i>       |          |          |           | 80                   | 140       | 70        | 130       | 92        | 114       | 49        | 179       | 149       | 130        | 160        | 135.9        |    |
| <i>#</i>       | <i>n</i> | <i>M</i> | <i>SD</i> | <i>S</i><br><i>D</i> | 2.6       | 2.2       | 3.3       | 2.8       | 3.3       | 2.3       | 5.7       | 1.7       | 0.8        | 2.6        | 0.3          | 27 |
| <i>P1</i>      | 149      | 80       | 2.6       |                      | -         |           |           |           |           |           |           |           |            |            |              |    |
| <i>P2</i>      | 397      | 140      | 2.2       |                      | -25.906   | -         |           |           |           |           |           |           |            |            |              |    |
| <i>P3</i>      | 288      | 70       | 3.3       |                      | 3.248     | 25.761    | -         |           |           |           |           |           |            |            |              |    |
| <i>P4</i>      | 414      | 130      | 2.8       |                      | -18.192   | 3.962     | -19.899   | -         |           |           |           |           |            |            |              |    |
| <i>P5</i>      | 652      | 92       | 3.3       |                      | -3.772    | 16.368    | -6.667    | 12.198    | -         |           |           |           |            |            |              |    |
| <i>P6</i>      | 608      | 114      | 2.3       |                      | -14.394   | 11.499    | -16.525   | 6.363     | -7.688    | -         |           |           |            |            |              |    |
| <i>P7</i>      | 157      | 49       | 5.7       |                      | 6.939     | 25.560    | 4.881     | 21.186    | 11.072    | 19.713    | -         |           |            |            |              |    |
| <i>P8</i>      | 718      | 179      | 1.7       |                      | -52.506   | -20.600   | -47.891   | -22.601   | -33.618   | -32.539   | -45.395   | -         |            |            |              |    |
| <i>P9</i>      | 4021     | 149      | 0.8       |                      | -74.462   | -8.923    | -68.629   | -16.587   | -39.616   | -31.295   | -73.784   | 3.291     | -          |            |              |    |
| <i>P10</i>     | 1565     | 130      | 2.6       |                      | -19.231   | 3.962     | -22.054   | 0         | -13.456   | -6.350    | -26.843   | 20.813    | 12.382     | -          |              |    |
| <i>P11</i>     | 308      | 160      | 0.3       |                      | -53.160   | -12.028   | -39.061   | -14.089   | -24.955   | -24.443   | -33.423   | 13.272    | -14.191    | -12.606    | -            |    |
| <i>Total</i>   | 9277     | 135.9    | 27        |                      |           |           |           |           |           |           |           |           |            |            |              |    |

Note. *n* = sample size; *M* = mean; *SD* = Standard deviation. Effect sizes measure using Cohen's *d*.

**Supplementary Table S13.** Matrix of Effect Size Comparisons amongst Career Profiles based on Same-Sex Proportion

|              |          |          |           | Career Profile | <i>P1</i> | <i>P2</i> | <i>P3</i> | <i>P4</i> | <i>P5</i> | <i>P6</i> | <i>P7</i> | <i>P8</i> | <i>P9</i> | <i>P10</i> | <i>P11</i> | <i>Total</i> |
|--------------|----------|----------|-----------|----------------|-----------|-----------|-----------|-----------|-----------|-----------|-----------|-----------|-----------|------------|------------|--------------|
|              |          |          |           | <i>n</i>       | 149       | 397       | 288       | 414       | 652       | 608       | 157       | 718       | 4021      | 1565       | 308        | 9277         |
|              |          |          |           | <i>M</i>       | 0.64      | 0.55      | 0.59      | 0.25      | 0.65      | 0.65      | 0.73      | 0.51      | 0.57      | 0.85       | 0.53       | 0.61         |
| #            | <i>n</i> | <i>M</i> | <i>SD</i> | <i>SD</i>      | 0.31      | 0.21      | 0.20      | 0.14      | 0.18      | 0.25      | 0.73      | 0.09      | 0.15      | 0.12       | 0.15       | 0.21         |
| <i>P1</i>    | 149      | 0.64     | 0.31      |                | -         |           |           |           |           |           |           |           |           |            |            |              |
| <i>P2</i>    | 397      | 0.55     | 0.21      |                | 0.373     | -         |           |           |           |           |           |           |           |            |            |              |
| <i>P3</i>    | 288      | 0.59     | 0.20      |                | 0.206     | -0.194    | -         |           |           |           |           |           |           |            |            |              |
| <i>P4</i>    | 414      | 0.25     | 0.14      |                | 1.954     | 1.688     | 2.033     | -         |           |           |           |           |           |            |            |              |
| <i>P5</i>    | 652      | 0.65     | 0.18      |                | -0.048    | -0.521    | -0.322    | -2.415    | -         |           |           |           |           |            |            |              |
| <i>P6</i>    | 608      | 0.65     | 0.25      |                | -0.038    | -0.426    | -0.255    | -1.883    | 0.000     | -         |           |           |           |            |            |              |
| <i>P7</i>    | 157      | 0.73     | 0.73      |                | -0.159    | -0.421    | -0.303    | -1.197    | -0.222    | -0.201    | -         |           |           |            |            |              |
| <i>P8</i>    | 718      | 0.51     | 0.09      |                | 0.853     | 0.277     | 0.609     | -2.344    | 0.998     | 0.770     | 0.688     | -         |           |            |            |              |
| <i>P9</i>    | 4021     | 0.57     | 0.15      |                | 0.442     | -0.128    | 0.130     | -20.146   | 0.518     | 0.480     | 0.784     | -0.421    | -         |            |            |              |
| <i>P10</i>   | 1565     | 0.85     | 0.12      |                | -1.432    | -2.100    | -1.918    | -4.821    | -1.425    | -1.198    | -0.483    | -3.051    | -1.969    | -          |            |              |
| <i>P11</i>   | 308      | 0.53     | 0.15      |                | 0.510     | 0.107     | 0.341     | -1.940    | 0.702     | 0.542     | 0.453     | -0.179    | 0.267     | 2.551      | -          |              |
| <i>Total</i> | 9277     | 0.61     | 0.21      |                |           |           |           |           |           |           |           |           |           |            |            |              |

Note. *n* = sample size; *M* = mean; *SD* = Standard deviation. Effect sizes measure using Cohen's *d*.

**Supplementary Table S14. Top Five Occupational Aspirations of Career Profiles by Sex ( $n=9277$ )**

| #   | <i>n</i> | Profile label                                | Fem.<br>% | % asp.<br>(m/f) | Occupational Aspirations                                                                                                                                 |                                                                                                                                               |
|-----|----------|----------------------------------------------|-----------|-----------------|----------------------------------------------------------------------------------------------------------------------------------------------------------|-----------------------------------------------------------------------------------------------------------------------------------------------|
|     |          |                                              |           |                 | Male                                                                                                                                                     | Female                                                                                                                                        |
| P1  | 149      | Low Prestige<br>Technical<br>Aspirations     | 38%       | 63/62           | Electrical engineering (23%), Machine operation (16%),<br>Business admin. (9%), Medicine (8%),<br>Police personnel (7%)                                  | Police personnel (19%), Medical technician (19%),<br>Procurement /Purchasing (14%), Business operation (10%)                                  |
| P2  | 397      | Natural Science<br>Aspirations               | 53%       | 78/72           | Physicists (26%), Chemists (25%), Biologists (16%),<br>Executive/Managing directors (6%), Geologists (5%)                                                | Biologists <sup>A</sup> (36%), Chemists (21%), Executive/Managing<br>directors (9%), Physicists (6%)                                          |
| P3  | 288      | Low Prestige<br>Economic<br>Aspirations      | 58%       | 73/54           | Technical design (25%), Business operation (17%),<br>Bankers (17%), Event management (7%),<br>Marketing (7%)                                             | Marketing (14%), Business operation (14%), Bankers (11%),<br>Event Management (10%), Chemical techn. Laboratory<br>(5%)                       |
| P4  | 414      | Low<br>Same-sex<br>Aspirations               | 88%       | 88/45           | Primary school teacher (60%),<br>Chemical/Pharmaceutical engineering (28%)                                                                               | Construct. Scheduling (15%), Product. Planning (9%),<br>Business consulting (9%), Controlling (7%), Machine<br>building/operating (5%)        |
| P5  | 652      | Low Prestige<br>Social Aspirations           | 73%       | 54/67           | Social work (15%), Musicians (13%), Graphic design (9%),<br>Financial investment advisers (9%), Sales (8%)                                               | Social work (53%), Child care (9%), Social and special<br>pedagogy (5%)                                                                       |
| P6  | 608      | Less Distinguish.<br>Aspirations             | 43%       | 59/61           | Computer scientist <sup>B</sup> (21%), Software developer (12%),<br>Business information (10%), Programming (9%),<br>Editors/Journalists (7%)            | Editors/Journalists (31%), Copy editors (12%),<br>Interpreter/translator (7%), Computer scientist <sup>B</sup> (6%), Hotel<br>executives (5%) |
| P7  | 157      | Low Prestige<br>High Same-sex<br>Aspirations | 26%       | 64/22           | Mechatronics (22%), Business supervisors (21%), Machine<br>building/operating (16%), Information & telecom.<br>Technology (5%)                           | Business supervisors (22%)                                                                                                                    |
| P8  | 718      | High Prestige<br>Medical Aspirations         | 68%       | 80/81           | Medical Doctor <sup>B</sup> (70%), Surgeon (10%)                                                                                                         | Medical Doctor <sup>B</sup> (69%), Pediatrics (7%), Surgeon (5%)                                                                              |
| P9  | 4021     | Teaching Aspirations                         | 74%       | 89/82           | Secondary school teacher (79%),<br>Executive/Managing directors (10%)                                                                                    | Secondary school teacher (82%)                                                                                                                |
| P10 | 1565     | High Same-sex<br>Aspirations                 | 31%       | 56/93           | Machine building/operating (18%), Production planning<br>(11%), Electrical engineering (10%), Construction<br>supervision (9%), Business consulting (8%) | Primary school teacher (93%)                                                                                                                  |
| P11 | 308      | Academic-Research<br>Aspirations             | 50%       | 97/84           | University/College research/teacher (83%),<br>Dentist (14%)                                                                                              | University/College researcher/teacher (56%), Dentists<br>(18%), Veterinarian (10%)                                                            |

Note. *n* = sample size; % asp (m/f) = Percentage of top five aspirations in relation to profile *n*. An occupation is omitted if less than 5% of the profile's *n* by sex aspire to it. ; <sup>A</sup> = 8% Biologists with no specialization, 24% with specializations; <sup>B</sup> = All occupations with no specialization.

**Supplementary Table S15.** Chi Square Test Contingency Table of Gender Distribution in relation to the Career Profiles

| Gender | Career Profiles        |                       |                      |                        |                         |                         |                        |                        |                           |                          |                       | Total          |
|--------|------------------------|-----------------------|----------------------|------------------------|-------------------------|-------------------------|------------------------|------------------------|---------------------------|--------------------------|-----------------------|----------------|
|        | P1<br>(n = 149)        | P2<br>(n = 397)       | P3<br>(n = 288)      | P4<br>(n = 414)        | P5<br>(n = 652)         | P6<br>(n = 608)         | P7<br>(n = 157)        | P8<br>(n = 718)        | P9<br>(n = 4021)          | P10<br>(n = 1565)        | P11<br>(n = 308)      |                |
| Male   | 92 [61.7]<br>4.500***  | 187 [47.1]<br>2.662** | 121 [42.0]<br>0.880  | 50 [12.1]<br>-8.726*** | 179 [27.5]<br>-4.645*** | 347 [57.1]<br>7.241***  | 116 [73.9]<br>7.062*** | 229 [31.9]<br>-2.965** | 1039 [25.8]<br>-13.181*** | 1085 [69.3]<br>19.403*** | 153 [49.7]<br>3.069** | 3598<br>[38.8] |
| Female | 57 [38.3]<br>-3.582*** | 210 [52.9]<br>-2.119* | 167 [58.0]<br>-0.701 | 364 [87.9]<br>6.945*** | 473 [72.5]<br>3.698***  | 261 [42.9]<br>-5.764*** | 41 [26.1]<br>-5.621*** | 489 [68.1]<br>2.360*   | 2982 [74.2]<br>10.491***  | 480 [30.7]<br>-15.444*** | 155 [50.3]<br>-2.443* | 5679<br>[61.2] |
| Total  | 149                    | 397                   | 288                  | 414                    | 652                     | 609                     | 157                    | 718                    | 4021                      | 1565                     | 308                   | 9277           |

Note.  $n=9277$ ,  $\chi^2(10) = 1301.216$ ,  $p < .001$ . Contingency Coeff. = 0.351, Cramer's V = 0.375;  $n[\%]$  = cell count [column percentages],  $z$  = Standardized residuals measured in  $z$ -scores. \* $p < .05$  if  $z > \pm 1.96$ ; \*\* $p < .01$  if  $z > \pm 2.58$ ; \*\*\* $p < .001$  if  $z > \pm 3.29$ .

**Supplementary Table S16.** Chi Square Test Contingency Table of Study Clusters in relation to the Career Profiles

| Study Clusters | Career Profiles        |                         |                         |                         |                         |                         |                         |                         |                          |                         |                        | Total          |
|----------------|------------------------|-------------------------|-------------------------|-------------------------|-------------------------|-------------------------|-------------------------|-------------------------|--------------------------|-------------------------|------------------------|----------------|
|                | P1<br>(n = 149)        | P2<br>(n = 397)         | P3<br>(n = 288)         | P4<br>(n = 414)         | P5<br>(n = 652)         | P6<br>(n = 608)         | P7<br>(n = 157)         | P8<br>(n = 718)         | P9<br>(n = 4021)         | P10<br>(n = 1565)       | P11<br>(n = 308)       |                |
| STEM-L         | 99 [66.4]<br>10.808*** | 116 [29.2]<br>2.346*    | 95 [33.0]<br>3.317**    | 173 [41.8]<br>7.670***  | 97 [14.8]<br>-4.546***  | 318 [52.3]<br>14.642*** | 116 [73.9]<br>13.018*** | 27 [3.8]<br>-10.914***  | 210 [5.2]<br>-23.916***  | 833 [53.2]<br>24.246*** | 97 [31.5]<br>2.890**   | 2181<br>[23.5] |
| STEM-M         | 13 [8.7]<br>-3.776***  | 240 [60.5]<br>14.954*** | 29 [10.1]<br>-4.782***  | 67 [16.2]<br>-3.184**   | 46 [7.1]<br>-8.772***   | 46 [7.6]<br>-8.213***   | 7 [4.5]<br>-4.971***    | 79 [11.0]<br>-7.038***  | 1326 [33.0]<br>11.894*** | 229 [14.6]<br>-7.449*** | 128 [41.6]<br>6.377*** | 2210<br>[23.8] |
| MED            | 1 [0.7]<br>-2.839**    | 1 [0.3]<br>-4.957***    | 1 [0.3]<br>-4.159***    | 1 [0.2]<br>-5.070***    | 0 [0.0]<br>-6.601***    | 1 [0.2]<br>-6.218***    | 0 [0.0]<br>-3.239***    | 576 [80.2]<br>76.224*** | 6 [0.1]<br>-16.027***    | 2 [0.1]<br>-10.031***   | 31 [10.1]<br>2.296**   | 620<br>[6.7]   |
| ECO            | 27 [18.1]<br>1.907     | 37 [9.3]<br>-1.831      | 144 [50.0]<br>17.905*** | 139 [33.6]<br>12.045*** | 125 [19.2]<br>4.746***  | 66 [10.9]<br>-1.199     | 19 [12.1]<br>-0.169     | 8 [1.1]<br>-8.662***    | 386 [9.6]<br>-5.328***   | 201 [12.8]<br>0.294     | 15 [4.9]<br>-3.815***  | 1167<br>[12.6] |
| EDU            | 1 [0.7]<br>-3.358***   | 1 [0.3]<br>-5.762***    | 6 [2.1]<br>-3.864***    | 10 [2.4]<br>-4.406***   | 341 [52.3]<br>37.263*** | 17 [2.8]<br>-5.024***   | 6 [3.8]<br>-2.121**     | 11 [1.5]<br>-6.597***   | 399 [9.9]<br>2.263**     | 19 [1.2]<br>-10.162***  | 11 [3.6]<br>-3.118**   | 822<br>[8.9]   |
| LANG           | 8 [5.4]<br>-4.725***   | 2 [0.5]<br>-9.669***    | 13 [4.5]<br>-6.861***   | 24 [5.8]<br>-7.700***   | 43 [6.6]<br>-9.251***   | 160 [26.3]<br>0.882     | 9 [5.7]<br>-4.758***    | 17 [2.4]<br>-11.995***  | 1694 [42.1]<br>22.507*** | 281 [18.0]<br>-5.262*** | 26 [8.4]<br>-5.704***  | 2277<br>[24.5] |
| Total          | 149                    | 397                     | 288                     | 414                     | 652                     | 608                     | 157                     | 718                     | 4021                     | 1565                    | 308                    | 9277           |

*Note.*  $n=9277$ ;  $\chi^2(50) = 12267.61$ ,  $p < .001$ . Minimum expected frequency: 9.957961;  $n[\%]$  = cell count [column percentages],  $z$  = Standardized residuals measured in  $z$ -scores. \* $p < .05$  if  $z > \pm 1.96$ ; \*\* $p < .01$  if  $z > \pm 2.58$ ; \*\*\* $p < .001$  if  $z > \pm 3.29$ . STEM-L = STEM studies with a sex proportion between 30-70%; STEM-M = STEM studies with a female proportion between of less than 30%, MED = Medicine, ECO = Economics, EDU = Education, LANG = Language.



**Supplementary Table S17.** Chi Square Test Contingency Table of Study Teaching Orientation in relation to the Career Profiles

| Study Teaching Orientation | Career Profiles        |                         |                        |                        |                         |                         |                        |                         |                          |                         |                        | Total          |
|----------------------------|------------------------|-------------------------|------------------------|------------------------|-------------------------|-------------------------|------------------------|-------------------------|--------------------------|-------------------------|------------------------|----------------|
|                            | P1<br>(n = 149)        | P2<br>(n = 397)         | P3<br>(n = 288)        | P4<br>(n = 414)        | P5<br>(n = 652)         | P6<br>(n = 608)         | P7<br>(n = 157)        | P8<br>(n = 718)         | P9<br>(n = 4021)         | P10<br>(n = 1565)       | P11<br>(n = 308)       |                |
| Teaching                   | 10 [6.7]<br>-6.885***  | 11 [2.8]<br>-12.419***  | 16 [5.6]<br>-9.867***  | 40 [9.8]<br>-10.434*** | 82 [12.6]<br>-12.117*** | 57 [9.4]<br>-12.920***  | 7 [4.5]<br>-7.492***   | 49 [6.8]<br>-15.068***  | 3357 [83.5]<br>37.491*** | 436 [27.9]<br>-9.705*** | 31 [10.1]<br>-9.014*** | 4096<br>[44.2] |
| Non-teaching               | 139 [93.3]<br>6.130*** | 386 [97.2]<br>11.058*** | 272 [94.4]<br>8.785*** | 367 [90.2]<br>9.290*** | 568 [87.4]<br>10.788*** | 551 [90.6]<br>11.504*** | 150 [95.5]<br>6.670*** | 669 [93.2]<br>13.416*** | 661 [16.5]<br>-33.380*** | 1127 [72.1]<br>8.641*** | 277 [89.9]<br>8.026*** | 5167<br>[55.8] |
| Total                      | 149                    | 397                     | 288                    | 407                    | 650                     | 608                     | 157                    | 718                     | 4018                     | 1563                    | 308                    | 9263           |

Note.  $n=9263$ ;  $\chi^2(10) = 4635.636$ ,  $p < .001$ . Contingency Coeff = 0.578, Cramer's V = 0.707;  $n[\%]$  = cell count [column percentages],  $z$  = Standardized residuals measured in  $z$ -scores. \* $p < .05$  if  $z > \pm 1.96$ ; \*\* $p < .01$  if  $z > \pm 2.58$ ; \*\*\* $p < .001$  if  $z > \pm 3.29$ .

**Supplementary Table S18. Descriptive Statistics of Early Background Variables by Career Profiles**

|                                               | P1<br>( <i>n</i> = 149)     | P2<br>( <i>n</i> = 397)     | P3<br>( <i>n</i> = 288)     | P4<br>( <i>n</i> = 414)     | P5<br>( <i>n</i> = 652)     | P6<br>( <i>n</i> = 608)     | P7<br>( <i>n</i> = 157)     | P8<br>( <i>n</i> = 718)     | P9<br>( <i>n</i> = 4021)    | P10<br>( <i>n</i> = 1565)   | P11<br>( <i>n</i> = 308)    | Total          |
|-----------------------------------------------|-----------------------------|-----------------------------|-----------------------------|-----------------------------|-----------------------------|-----------------------------|-----------------------------|-----------------------------|-----------------------------|-----------------------------|-----------------------------|----------------|
| <i>Study Outcome</i>                          | 149                         | 397                         | 288                         | 414                         | 651                         | 608                         | 157                         | 717                         | 4019                        | 1565                        | 308                         | 9273           |
| <i>Expectations</i>                           | 4.21 (0.69)<br>[4.10; 4.33] | 4.39 (0.66)<br>[4.32; 4.45] | 4.29 (0.73)<br>[4.21; 4.38] | 4.37 (0.67)<br>[4.31; 4.44] | 4.37 (0.67)<br>[4.32; 4.42] | 4.43 (0.68)<br>[4.38; 4.48] | 4.25 (0.69)<br>[4.15; 4.36] | 4.49 (0.67)<br>[4.44; 4.54] | 4.39 (0.63)<br>[4.37; 4.41] | 4.39 (0.64)<br>[4.35; 4.42] | 4.48 (0.70)<br>[4.40; 4.56] | 4.39<br>(0.65) |
| <i>Chances for<br/>getting a good<br/>job</i> | 149                         | 394                         | 287                         | 412                         | 647                         | 605                         | 153                         | 717                         | 4006                        | 1559                        | 305                         | 9234           |
|                                               | 4.32 (0.7)<br>[4.20; 4.43]  | 4.07 (0.8)<br>[3.98; 4.15]  | 4.18 (0.7)<br>[4.09; 4.27]  | 4.10 (0.8)<br>[4.03; 4.18]  | 3.87 (0.8)<br>[3.81; 3.93]  | 3.97 (0.9)<br>[3.90; 4.04]  | 4.20 (0.8)<br>[4.07; 4.32]  | 4.49 (0.7)<br>[4.44; 4.54]  | 3.96 (0.8)<br>[3.93; 3.98]  | 4.14 (0.8)<br>[4.10; 4.18]  | 4.20 (0.8)<br>[4.11; 4.29]  | 4.06<br>(0.81) |
| <i>Importance of<br/>Status</i>               | 146                         | 392                         | 282                         | 405                         | 640                         | 600                         | 154                         | 709                         | 3965                        | 1542                        | 299                         | 9134           |
| <i>Maintenance of<br/>Parents</i>             | 2.81 (1.3)<br>[2.60; 3.02]  | 2.96 (1.3)<br>[2.83; 3.10]  | 3.05 (1.3)<br>[2.90; 3.20]  | 3.04 (1.4)<br>[2.90; 3.17]  | 2.81 (1.3)<br>[2.71; 2.92]  | 3.07 (1.3)<br>[2.97; 3.18]  | 2.89 (1.4)<br>[2.68; 3.11]  | 2.67 (1.3)<br>[2.57; 2.76]  | 2.70 (1.3)<br>[2.66; 2.74]  | 2.85 (1.3)<br>[2.79; 2.92]  | 3.05 (1.4)<br>[2.89; 3.20]  | 2.81<br>(1.34) |

*Note.* *n* = Profile sample size from whole sample. Profile sample size by variable indicated in italics. Means are indicated followed by standard deviation in brackets “( )” Lower and upper confidence intervals indicated in square brackets “[ ]”.

**Supplementary Table S19.** Descriptive Statistics of Validation Variables by Career Profiles

|                                                  | P1<br>( <i>n</i> = 149)      | P2<br>( <i>n</i> = 397)      | P3<br>( <i>n</i> = 288)      | P4<br>( <i>n</i> = 414)          | P5<br>( <i>n</i> = 652)      | P6<br>( <i>n</i> = 608)     | P7<br>( <i>n</i> = 157)      | P8<br>( <i>n</i> = 718)      | P9<br>( <i>n</i> = 4021)     | P10<br>( <i>n</i> = 1565)    | P11<br>( <i>n</i> = 308)     | Total           |
|--------------------------------------------------|------------------------------|------------------------------|------------------------------|----------------------------------|------------------------------|-----------------------------|------------------------------|------------------------------|------------------------------|------------------------------|------------------------------|-----------------|
| <b>Study Satisfaction</b>                        | 104                          | 283                          | 194                          | 280                              | 452                          | 397                         | 91                           | 550                          | 2930                         | 1117                         | 217                          | 6615            |
| - Study Content                                  | 7.39 (1.78)<br>[7.04; 7.74]  | 8.08 (1.47)<br>[7.91; 8.26]  | 7.64 (1.69)<br>[7.40; 7.87]  | 7.87 (1.60)<br>[7.68; 8.06]      | 7.63 (1.73)<br>[7.47; 7.79]  | 7.77 (1.51)<br>[7.62; 7.92] | 7.56 (1.61)<br>[7.23; 7.90]  | 8.16 (1.41)<br>[8.04; 8.28]  | 7.66 (1.56)<br>[7.60; 7.72]  | 7.72 (1.52)<br>[7.63; 7.81]  | 8.03 (1.48)<br>[7.83; 8.23]  | 7.75<br>(1.57)  |
| - Study Conditions                               | 5.30 (2.08)<br>[4.89; 5.70]  | 5.26 (2.03)<br>[5.03; 5.50]  | 5.53 (2.19)<br>[5.22; 5.84]  | 5.42 (2.26)<br>[5.15; 5.69]      | 5.19 (2.06)<br>[4.99; 5.38]  | 5.63 (2.18)<br>[5.41; 5.85] | 5.19 (1.97)<br>[4.78; 5.60]  | 5.02 (2.09)<br>[4.84; 5.19]  | 4.48 (2.04)<br>[4.40; 4.56]  | 5.13 (2.13)<br>[5.00; 5.25]  | 5.33 (2.22)<br>[5.03; 5.62]  | 4.91<br>(2.13)  |
| - Coping with Study Burdens                      | 5.97 (2.07)<br>[5.56; 6.37]  | 5.26 (2.11)<br>[5.01; 5.51]  | 5.69 (2.14)<br>[5.39; 5.99]  | 5.87 (2.04)<br>[5.63; 6.11]      | 6.37 (2.04)<br>[6.18; 6.56]  | 6.13 (1.98)<br>[5.94; 6.33] | 5.41 (2.00)<br>[4.99; 5.82]  | 4.78 (2.21)<br>[4.59; 4.96]  | 5.94 (2.05)<br>[5.87; 6.02]  | 5.90 (1.95)<br>[5.79; 6.02]  | 5.71 (2.03)<br>[5.44; 5.98]  | 5.83<br>(2.08)  |
| <b>Intention to Dropout</b>                      | 95                           | 259                          | 182                          | 271                              | 411                          | 380                         | 85                           | 482                          | 2623                         | 974                          | 202                          | 5964            |
|                                                  | 1.58 (.64)<br>[1.45; 1.71]   | 1.47 (0.59)<br>[1.40; 1.54]  | 1.56 (0.71)<br>[1.46; 1.67]  | 1.45 (0.57)<br>[1.38; 1.52]      | 1.49 (0.60)<br>[1.43; 1.54]  | 1.50 (0.63)<br>[1.43; 1.56] | 1.46 (0.53)<br>[1.34; 1.57]  | 1.40 (0.55)<br>[1.35; 1.45]  | 1.49 (0.56)<br>[1.47; 1.51]  | 1.44 (0.56)<br>[1.40; 1.47]  | 1.51 (0.65)<br>[1.42; 1.60]  | 1.48<br>(0.58)  |
| <b>Standardized Grades at the End of Studies</b> | 47                           | 160                          | 77                           | 126                              | 190                          | 150                         | 40                           | 265                          | 1184                         | 473                          | 112                          | 2824            |
|                                                  | 0.01 (0.99)<br>[-0.28; 0.31] | -0.13(0.96)<br>[-0.28; 0.02] | 0.05 (1.06)<br>[-0.19; 0.29] | -0.19(0.89)<br>[-0.34;<br>-0.03] | 0.14 (0.03)<br>[-0.01; 0.29] | -0.09(1.00)<br>[0.25; 0.07] | -0.10(0.86)<br>[-0.37; 0.19] | -0.08(1.04)<br>[-0.20; 0.05] | 0.02 (0.99)<br>[-0.04; 0.07] | -0.06(0.94)<br>[-0.15; 0.02] | -0.18(0.99)<br>[-0.36; 0.01] | -0.03<br>(0.99) |
| <b>Gender Role Attitude</b>                      | 71                           | 174                          | 122                          | 181                              | 284                          | 245                         | 59                           | 387                          | 1998                         | 638                          | 142                          | 4301            |
|                                                  | 3.27 (0.35)<br>[3.18; 3.35]  | 3.32 (0.35)<br>[3.27; 3.37]  | 3.13 (0.42)<br>[3.06; 3.21]  | 3.35 (0.40)<br>[3.30; 3.41]      | 3.37 (0.41)<br>[3.32; 3.41]  | 3.24 (0.43)<br>[3.19; 3.30] | 3.20 (0.39)<br>[3.09; 3.30]  | 3.33 (0.40)<br>[3.29; 3.37]  | 3.30 (0.39)<br>[3.29; 3.32]  | 3.11 (0.45)<br>[3.08; 3.15]  | 3.30 (0.45)<br>[3.22; 3.37]  | 3.27<br>(0.41)  |

Note. *n* = Profile sample size from whole sample. Profile sample size by variable indicated in italics. Means are indicated followed by standard deviation in brackets “( )” Lower and upper confidence intervals indicated in square brackets “[ ]”.

**Supplementary Table S20.** Matrix of Effect Size Comparisons amongst Career Profiles based on Intentions to Dropout

|              |          |          |           | Career Profile | <i>P1</i> | <i>P2</i> | <i>P3</i> | <i>P4</i> | <i>P5</i> | <i>P6</i> | <i>P7</i> | <i>P8</i> | <i>P9</i> | <i>P10</i> | <i>P11</i> | <i>Total</i> |
|--------------|----------|----------|-----------|----------------|-----------|-----------|-----------|-----------|-----------|-----------|-----------|-----------|-----------|------------|------------|--------------|
|              |          |          |           | <i>n</i>       | 95        | 259       | 182       | 271       | 411       | 380       | 85        | 482       | 2623      | 974        | 202        | 5964         |
|              |          |          |           | <b>M</b>       | 1.58      | 1.47      | 1.56      | 1.45      | 1.49      | 1.50      | 1.46      | 1.40      | 1.49      | 1.44       | 1.51       | 1.48         |
| #            | <i>n</i> | <b>M</b> | <b>SD</b> | <b>SD</b>      | 0.64      | 0.59      | 0.71      | 0.57      | 0.60      | 0.63      | 0.53      | 0.55      | 0.56      | 0.56       | 0.65       | 0.58         |
| <i>P1</i>    | 95       | 1.58     | 0.64      |                | -         |           |           |           |           |           |           |           |           |            |            |              |
| <i>P2</i>    | 259      | 1.47     | 0.59      |                | 0.182     | -         |           |           |           |           |           |           |           |            |            |              |
| <i>P3</i>    | 182      | 1.56     | 0.71      |                | 0.029     | −0.140    | -         |           |           |           |           |           |           |            |            |              |
| <i>P4</i>    | 271      | 1.45     | 0.57      |                | 0.221     | 0.034     | 0.175     | -         |           |           |           |           |           |            |            |              |
| <i>P5</i>    | 411      | 1.49     | 0.60      |                | 0.148     | −0.034    | 0.110     | −0.068    | -         |           |           |           |           |            |            |              |
| <i>P6</i>    | 380      | 1.50     | 0.63      |                | 0.127     | −0.049    | 0.091     | −0.083    | −0.016    | -         |           |           |           |            |            |              |
| <i>P7</i>    | 85       | 1.46     | 0.53      |                | 0.203     | 0.017     | 0.152     | −0.018    | 0.051     | 0.065     | -         |           |           |            |            |              |
| <i>P8</i>    | 482      | 1.40     | 0.55      |                | 0.318     | 0.124     | 0.268     | 0.090     | 0.157     | 0.170     | 0.110     | -         |           |            |            |              |
| <i>P9</i>    | 2623     | 1.49     | 0.56      |                | 0.160     | −0.036    | 0.123     | −0.071    | 0.000     | 0.018     | −0.054    | −0.161    | -         |            |            |              |
| <i>P10</i>   | 974      | 1.44     | 0.56      |                | 0.247     | 0.053     | 0.205     | 0.018     | 0.087     | 0.103     | 0.036     | −0.072    | 0.089     | -          |            |              |
| <i>P11</i>   | 202      | 1.51     | 0.65      |                | 0.108     | −0.065    | 0.074     | −0.099    | −0.032    | −0.016    | −0.081    | −0.189    | −0.035    | −0.121     | -          |              |
| <i>Total</i> | 5964     | 1.48     | 0.58      |                |           |           |           |           |           |           |           |           |           |            |            |              |

Note. *n* = sample size; *M* = mean; *SD* = Standard deviation. Effect sizes measure using Cohen's *d*.

**Supplementary Table S21.** Matrix of Effect Size Comparisons amongst Career Profiles based on Satisfaction with Study Content

|              |          |          |           | Career Profile | <i>P1</i> | <i>P2</i> | <i>P3</i> | <i>P4</i> | <i>P5</i> | <i>P6</i> | <i>P7</i> | <i>P8</i> | <i>P9</i> | <i>P10</i> | <i>P11</i> | <i>Total</i> |
|--------------|----------|----------|-----------|----------------|-----------|-----------|-----------|-----------|-----------|-----------|-----------|-----------|-----------|------------|------------|--------------|
|              |          |          |           | <i>n</i>       | 104       | 283       | 194       | 280       | 452       | 397       | 91        | 550       | 2930      | 1117       | 217        | 6615         |
|              |          |          |           | <i>M</i>       | 7.39      | 8.08      | 7.64      | 7.87      | 7.63      | 7.77      | 7.56      | 8.16      | 7.66      | 7.72       | 8.03       | 7.75         |
| <i>#</i>     | <i>n</i> | <i>M</i> | <i>SD</i> | <i>SD</i>      | 1.78      | 1.47      | 1.69      | 1.60      | 1.73      | 1.51      | 1.61      | 1.41      | 1.56      | 1.52       | 1.48       | 1.57         |
| <i>P1</i>    | 104      | 7.39     | 1.78      |                | -         |           |           |           |           |           |           |           |           |            |            |              |
| <i>P2</i>    | 283      | 8.08     | 1.47      |                | -0.442    | -         |           |           |           |           |           |           |           |            |            |              |
| <i>P3</i>    | 194      | 7.64     | 1.69      |                | -0.145    | 0.281     | -         |           |           |           |           |           |           |            |            |              |
| <i>P4</i>    | 280      | 7.87     | 1.60      |                | -0.291    | 0.137     | -0.140    | -         |           |           |           |           |           |            |            |              |
| <i>P5</i>    | 452      | 7.63     | 1.73      |                | -0.138    | 0.275     | 0.006     | 0.143     | -         |           |           |           |           |            |            |              |
| <i>P6</i>    | 397      | 7.77     | 1.51      |                | -0.242    | 0.208     | -0.083    | 0.065     | -0.086    | -         |           |           |           |            |            |              |
| <i>P7</i>    | 91       | 7.56     | 1.61      |                | -0.100    | 0.345     | 0.048     | 0.193     | 0.041     | 0.137     | -         |           |           |            |            |              |
| <i>P8</i>    | 550      | 8.16     | 1.41      |                | -0.522    | -0.056    | -0.349    | -0.196    | -0.339    | -0.268    | -0.417    | -         |           |            |            |              |
| <i>P9</i>    | 2930     | 7.66     | 1.56      |                | -0.172    | 0.271     | -0.013    | 0.134     | -0.019    | 0.071     | -0.064    | 0.325     | -         |            |            |              |
| <i>P10</i>   | 1117     | 7.72     | 1.52      |                | -0.214    | 0.238     | -0.052    | 0.098     | -0.057    | 0.033     | -0.105    | 0.296     | -0.039    | -          |            |              |
| <i>P11</i>   | 217      | 8.03     | 1.48      |                | -0.404    | 0.034     | -0.246    | -0.103    | -0.242    | -0.173    | -0.309    | 0.091     | -0.238    | -0.205     | -          |              |
| <i>Total</i> | 6615     | 7.75     | 1.57      |                |           |           |           |           |           |           |           |           |           |            |            |              |

Note. *n* = sample size; *M* = mean; *SD* = Standard deviation. Effect sizes measure using Cohen's *d*.

**Supplementary Table S22.** Matrix of Effect Size Comparisons amongst Career Profiles based on Satisfaction with Study Conditions

| Career Profile |          |          |           | <i>P1</i> | <i>P2</i> | <i>P3</i> | <i>P4</i> | <i>P5</i> | <i>P6</i> | <i>P7</i> | <i>P8</i> | <i>P9</i> | <i>P10</i> | <i>P11</i> | <i>Total</i> |
|----------------|----------|----------|-----------|-----------|-----------|-----------|-----------|-----------|-----------|-----------|-----------|-----------|------------|------------|--------------|
| <i>n</i>       |          |          |           | 104       | 283       | 194       | 280       | 452       | 397       | 91        | 550       | 2930      | 1117       | 217        | 6615         |
| <i>M</i>       |          |          |           | 5.30      | 5.26      | 5.53      | 5.42      | 5.19      | 5.63      | 5.19      | 5.02      | 4.48      | 5.13       | 5.33       | 4.91         |
| #              | <i>n</i> | <i>M</i> | <i>SD</i> | <i>SD</i> | 2.08      | 2.03      | 2.19      | 2.26      | 2.06      | 2.18      | 1.97      | 2.09      | 2.04       | 2.13       | 2.13         |
| <i>P1</i>      | 104      | 5.3      | 2.08      |           | -         |           |           |           |           |           |           |           |            |            |              |
| <i>P2</i>      | 283      | 5.26     | 2.03      |           | 0.020     | -         |           |           |           |           |           |           |            |            |              |
| <i>P3</i>      | 194      | 5.53     | 2.19      |           | -0.107    | -0.129    | -         |           |           |           |           |           |            |            |              |
| <i>P4</i>      | 280      | 5.42     | 2.26      |           | -0.054    | -0.075    | 0.049     | -         |           |           |           |           |            |            |              |
| <i>P5</i>      | 452      | 5.19     | 2.06      |           | 0.053     | 0.034     | 0.162     | 0.108     | -         |           |           |           |            |            |              |
| <i>P6</i>      | 397      | 5.63     | 2.18      |           | -0.153    | -0.175    | -0.046    | -0.095    | -0.208    | -         |           |           |            |            |              |
| <i>P7</i>      | 91       | 5.19     | 1.97      |           | 0.054     | 0.035     | 0.160     | 0.105     | 0.000     | 0.205     | -         |           |            |            |              |
| <i>P8</i>      | 550      | 5.02     | 2.09      |           | 0.134     | 0.116     | 0.241     | 0.186     | 0.082     | 0.287     | 0.082     | -         |            |            |              |
| <i>P9</i>      | 2930     | 4.48     | 2.04      |           | 0.402     | 0.383     | 0.512     | 0.456     | 0.348     | 0.559     | 0.348     | 0.264     | -          |            |              |
| <i>P10</i>     | 1117     | 5.13     | 2.13      |           | 0.080     | 0.062     | 0.187     | 0.134     | 0.028     | 0.233     | 0.028     | -0.052    | -0.315     | -          |              |
| <i>P11</i>     | 217      | 5.33     | 2.22      |           | -0.014    | -0.033    | 0.091     | 0.040     | -0.066    | 0.137     | -0.065    | -0.146    | -0.414     | -0.093     | -            |
| <i>Total</i>   | 6615     | 4.91     | 2.13      |           |           |           |           |           |           |           |           |           |            |            |              |

Note. *n* = sample size; *M* = mean; *SD* = Standard deviation. Effect sizes measure using Cohen's *d*.

**Supplementary Table S23.** Matrix of Effect Size Comparisons amongst Career Profiles based on Satisfaction with Coping with Study Burdens

|              |          |          |           | Career Profile | <i>P1</i> | <i>P2</i> | <i>P3</i> | <i>P4</i> | <i>P5</i> | <i>P6</i> | <i>P7</i> | <i>P8</i> | <i>P9</i> | <i>P10</i> | <i>P11</i> | <i>Total</i> |
|--------------|----------|----------|-----------|----------------|-----------|-----------|-----------|-----------|-----------|-----------|-----------|-----------|-----------|------------|------------|--------------|
|              |          |          |           | <i>n</i>       | 104       | 283       | 194       | 280       | 452       | 397       | 91        | 550       | 2930      | 1117       | 217        | 6615         |
|              |          |          |           | <i>M</i>       | 5.97      | 5.26      | 5.69      | 5.87      | 6.37      | 6.13      | 5.41      | 4.78      | 5.94      | 5.90       | 5.71       | 5.83         |
| #            | <i>n</i> | <i>M</i> | <i>SD</i> | <i>SD</i>      | 2.07      | 2.11      | 2.14      | 2.04      | 2.04      | 1.98      | 2.00      | 2.21      | 2.05      | 1.95       | 2.03       | 2.08         |
| <i>P1</i>    | 104      | 5.97     | 2.07      |                | -         |           |           |           |           |           |           |           |           |            |            |              |
| <i>P2</i>    | 283      | 5.26     | 2.11      |                | 0.338     | -         |           |           |           |           |           |           |           |            |            |              |
| <i>P3</i>    | 194      | 5.69     | 2.14      |                | 0.132     | -0.203    | -         |           |           |           |           |           |           |            |            |              |
| <i>P4</i>    | 280      | 5.87     | 2.04      |                | 0.049     | -0.294    | -0.086    | -         |           |           |           |           |           |            |            |              |
| <i>P5</i>    | 452      | 6.37     | 2.04      |                | -0.196    | -0.537    | -0.328    | -0.245    | -         |           |           |           |           |            |            |              |
| <i>P6</i>    | 397      | 6.13     | 1.98      |                | -0.080    | -0.427    | -0.216    | -0.130    | 0.119     | -         |           |           |           |            |            |              |
| <i>P7</i>    | 91       | 5.41     | 2.00      |                | 0.275     | -0.072    | 0.134     | 0.227     | 0.472     | 0.363     | -         |           |           |            |            |              |
| <i>P8</i>    | 550      | 4.78     | 2.21      |                | 0.544     | 0.221     | 0.415     | 0.506     | 0.745     | 0.638     | 0.289     | -         |           |            |            |              |
| <i>P9</i>    | 2930     | 5.94     | 2.05      |                | 0.015     | -0.331    | -0.122    | -0.034    | 0.210     | 0.093     | -0.259    | -0.559    | -         |            |            |              |
| <i>P10</i>   | 1117     | 5.90     | 1.95      |                | 0.036     | -0.323    | -0.106    | -0.015    | 0.238     | 0.117     | -0.251    | -0.549    | 0.020     | -          |            |              |
| <i>P11</i>   | 217      | 5.71     | 2.03      |                | 0.127     | -0.217    | -0.010    | 0.079     | 0.324     | 0.210     | -0.148    | -0.430    | 0.112     | 0.097      | -          |              |
| <i>Total</i> | 6615     | 5.83     | 2.08      |                |           |           |           |           |           |           |           |           |           |            |            |              |

Note. *n* = sample size; *M* = mean; *SD* = Standard deviation. Effect sizes measure using Cohen's *d*.

**Supplementary Table S24.** Matrix of Effect Size Comparisons amongst Career Profiles based on Grades at the End of Studies

|              |          |          |           | Career Profile | <i>P1</i> | <i>P2</i> | <i>P3</i> | <i>P4</i> | <i>P5</i> | <i>P6</i> | <i>P7</i> | <i>P8</i> | <i>P9</i> | <i>P10</i> | <i>P11</i> | <i>Total</i> |
|--------------|----------|----------|-----------|----------------|-----------|-----------|-----------|-----------|-----------|-----------|-----------|-----------|-----------|------------|------------|--------------|
|              |          |          |           | <i>n</i>       | 47        | 160       | 77        | 126       | 190       | 150       | 40        | 265       | 1184      | 473        | 112        | 2824         |
|              |          |          |           | <i>M</i>       | 0.01      | -0.13     | 0.05      | -0.19     | 0.14      | -0.09     | -0.10     | -0.08     | 0.02      | -0.06      | -0.18      | -0.03        |
| <i>#</i>     | <i>n</i> | <i>M</i> | <i>SD</i> | <i>SD</i>      | 0.99      | 0.96      | 1.06      | 0.89      | 1.03      | 1.00      | 0.86      | 1.04      | 0.99      | 0.94       | 0.99       | 0.99         |
| <i>P1</i>    | 47       | 0.01     | 0.99      |                | -         |           |           |           |           |           |           |           |           |            |            |              |
| <i>P2</i>    | 160      | -0.13    | 0.96      |                | 0.145     | -         |           |           |           |           |           |           |           |            |            |              |
| <i>P3</i>    | 77       | 0.05     | 1.06      |                | -0.039    | -0.181    | -         |           |           |           |           |           |           |            |            |              |
| <i>P4</i>    | 126      | -0.19    | 0.89      |                | 0.218     | 0.065     | 0.251     | -         |           |           |           |           |           |            |            |              |
| <i>P5</i>    | 190      | 0.14     | 1.03      |                | -0.127    | -0.270    | -0.087    | -0.338    | -         |           |           |           |           |            |            |              |
| <i>P6</i>    | 150      | -0.09    | 1.00      |                | 0.100     | -0.041    | 0.137     | -0.105    | 0.226     | -         |           |           |           |            |            |              |
| <i>P7</i>    | 40       | -0.10    | 0.86      |                | 0.118     | -0.032    | 0.151     | -0.102    | 0.239     | 0.010     | -         |           |           |            |            |              |
| <i>P8</i>    | 265      | -0.08    | 1.04      |                | 0.087     | -0.049    | 0.124     | -0.111    | 0.212     | -0.010    | -0.020    | -         |           |            |            |              |
| <i>P9</i>    | 1184     | 0.02     | 0.99      |                | -0.010    | -0.152    | 0.030     | -0.214    | 0.121     | -0.111    | -0.122    | -0.100    | -         |            |            |              |
| <i>P10</i>   | 473      | -0.06    | 0.94      |                | 0.074     | -0.074    | 0.115     | -0.140    | 0.207     | -0.031    | -0.043    | -0.020    | 0.082     | -          |            |              |
| <i>P11</i>   | 112      | -0.18    | 0.99      |                | 0.192     | 0.051     | 0.226     | -0.011    | 0.315     | 0.090     | 0.084     | 0.098     | 0.202     | 0.126      | -          |              |
| <i>Total</i> | 2824     | -0.03    | 0.99      |                |           |           |           |           |           |           |           |           |           |            |            |              |

Note. *n* = sample size; *M* = mean; *SD* = Standard deviation. Effect sizes measure using Cohen's *d*.



**Supplementary Table S25.** Matrix of Effect Size Comparisons amongst Career Profiles based on Gender Role Attitudes

|              |          |          |           | Career Profile | <i>P1</i> | <i>P2</i> | <i>P3</i> | <i>P4</i> | <i>P5</i> | <i>P6</i> | <i>P7</i> | <i>P8</i> | <i>P9</i> | <i>P10</i> | <i>P11</i> | <i>Total</i> |  |
|--------------|----------|----------|-----------|----------------|-----------|-----------|-----------|-----------|-----------|-----------|-----------|-----------|-----------|------------|------------|--------------|--|
|              |          |          |           | <i>n</i>       | 71        | 174       | 122       | 181       | 284       | 245       | 59        | 387       | 1998      | 638        | 142        | 4301         |  |
|              |          |          |           | <b>M</b>       | 3.27      | 3.32      | 3.13      | 3.35      | 3.37      | 3.24      | 3.20      | 3.33      | 3.30      | 3.11       | 3.30       | 3.27         |  |
| <i>#</i>     | <i>n</i> | <b>M</b> | <b>SD</b> | <b>SD</b>      | 0.35      | 0.35      | 0.42      | 0.40      | 0.41      | 0.43      | 0.39      | 0.40      | 0.39      | 0.45       | 0.45       | 0.41         |  |
| <i>P1</i>    | 71       | 3.27     | 0.35      |                | -         |           |           |           |           |           |           |           |           |            |            |              |  |
| <i>P2</i>    | 174      | 3.32     | 0.35      |                | 0.145     | -         |           |           |           |           |           |           |           |            |            |              |  |
| <i>P3</i>    | 122      | 3.13     | 0.42      |                | −0.039    | −0.181    | -         |           |           |           |           |           |           |            |            |              |  |
| <i>P4</i>    | 181      | 3.35     | 0.40      |                | 0.218     | 0.065     | 0.251     | -         |           |           |           |           |           |            |            |              |  |
| <i>P5</i>    | 284      | 3.37     | 0.41      |                | −0.127    | −0.270    | −0.087    | −0.338    | -         |           |           |           |           |            |            |              |  |
| <i>P6</i>    | 245      | 3.24     | 0.43      |                | 0.100     | −0.041    | 0.137     | −0.105    | 0.226     | -         |           |           |           |            |            |              |  |
| <i>P7</i>    | 59       | 3.20     | 0.39      |                | 0.118     | −0.032    | 0.151     | −0.102    | 0.239     | 0.010     | -         |           |           |            |            |              |  |
| <i>P8</i>    | 387      | 3.33     | 0.40      |                | 0.087     | −0.049    | 0.124     | −0.111    | 0.212     | −0.010    | −0.020    | -         |           |            |            |              |  |
| <i>P9</i>    | 1998     | 3.30     | 0.39      |                | −0.010    | −0.152    | 0.030     | −0.214    | 0.121     | −0.111    | −0.122    | −0.100    | -         |            |            |              |  |
| <i>P10</i>   | 638      | 3.11     | 0.45      |                | 0.074     | −0.074    | 0.115     | −0.140    | 0.207     | −0.031    | −0.043    | −0.020    | 0.082     | -          |            |              |  |
| <i>P11</i>   | 142      | 3.30     | 0.45      |                | 0.192     | 0.051     | 0.226     | −0.011    | 0.315     | 0.090     | 0.084     | 0.098     | 0.202     | 0.126      | -          |              |  |
| <i>Total</i> | 4301     | 3.27     | 0.41      |                |           |           |           |           |           |           |           |           |           |            |            |              |  |

*Note.* *n* = sample size; *M* = mean; *SD* = Standard deviation. Effect sizes measure using Cohen's *d*.

**Supplementary Table S26.** Chi Square Test Contingency Table of Study Outcomes in relation to the Career Profiles

| Study Outcome         | Career Profiles     |                        |                      |                      |                       |                       |                     |                        |                            |                        |                      | Total          |
|-----------------------|---------------------|------------------------|----------------------|----------------------|-----------------------|-----------------------|---------------------|------------------------|----------------------------|------------------------|----------------------|----------------|
|                       | P1<br>(n = 149)     | P2<br>(n = 397)        | P3<br>(n = 288)      | P4<br>(n = 414)      | P5<br>(n = 652)       | P6<br>(n = 608)       | P7<br>(n = 157)     | P8<br>(n = 718)        | P9<br>(n = 4021)           | P10<br>(n = 1565)      | P11<br>(n = 308)     |                |
| Successfully finished | 75 [50.7]<br>1.391  | 201 [51.8]<br>2.590**  | 115 [41.4]<br>-0.456 | 198 [48.9]<br>1.753  | 315 [48.8]<br>2.193*  | 226 [37.9]<br>-1.974* | 57 [37.5]<br>-1.063 | 351 [50.4]<br>2.918**  | 1579 [39.7]<br>- 3.363 *** | 686 [44.3]<br>0.672    | 144 [47.2]<br>1.076  | [43.2]<br>3947 |
| Failed                | 29 [19.6]<br>0.313  | 77 [19.8]<br>-0.399    | 57 [20.5]<br>-0.097  | 61 [15.0]<br>-2.520* | 106 [16.4]<br>-2.415* | 128 [21.4]<br>0.361   | 27 [17.8]<br>-0.813 | 92 [13.2]<br>-4.370*** | 981 [24.6]<br>5.364***     | 267 [17.2]<br>-3.049** | 74 [24.3]<br>1.339   | [20.8]<br>1899 |
| Open                  | 44 [29.7]<br>-1.284 | 110 [28.4]<br>- 2.531* | 106 [38.1]<br>0.573  | 146 [36.0]<br>-0.006 | 224 [34.7]<br>-0.566  | 243 [40.7]<br>1.886   | 68 [44.7]<br>1.780  | 253 [36.4]<br>0.124    | 1421 [35.7]<br>-0.392      | 596 [38.5]<br>1.579    | 87 [28.5]<br>-2.193* | [36.1]<br>3298 |
| Total                 | 148                 | 388                    | 278                  | 405                  | 645                   | 597                   | 152                 | 696                    | 3981                       | 1549                   | 305                  | 9144           |

*Note.*  $n=9144$ ;  $\chi^2 (20) = 138.297$ ,  $p < .001$ . Contingency Coeff = 0.122, Cramer's V = 0.087; The cell counts are indicated outside the brackets while column percentages are indicated inside the square brackets; below the cell counts and percentages are the standardized residuals measured in z-scores. \* $p < .05$  if  $z > \pm 1.96$ ; \*\* $p < .01$  if  $z > \pm 2.58$ ; \*\*\* $p < .001$  if  $z > \pm 3.29$ .

**Supplementary Table S27. Descriptive Statistics of Career Profile's Occupational Prestige with Parents**

|                                         | P1<br>( <i>n</i> = 149)       | P2<br>( <i>n</i> = 397)         | P3<br>( <i>n</i> = 288)      | P4<br>( <i>n</i> = 414)       | P5<br>( <i>n</i> = 652)      | P6<br>( <i>n</i> = 608)      | P7<br>( <i>n</i> = 157)       | P8<br>( <i>n</i> = 718)         | P9<br>( <i>n</i> = 4021)        | P10<br>( <i>n</i> = 1565)      | P11<br>( <i>n</i> = 308)        | Total<br><i>n</i> =9277 |
|-----------------------------------------|-------------------------------|---------------------------------|------------------------------|-------------------------------|------------------------------|------------------------------|-------------------------------|---------------------------------|---------------------------------|--------------------------------|---------------------------------|-------------------------|
| <b><i>Career Profile's Prestige</i></b> | 80.4 (2.6)<br>[80; 81]        | 140.0 (2.2)<br>[140; 140]       | 70.2 (3.3)<br>[70; 71]       | 130.0 (2.8)<br>[130; 130]     | 91.8 (3.3)<br>[92; 92]       | 114.0 (2.3)<br>[114; 114]    | 49.0 (5.7)<br>[48; 50]        | 179.0 (1.7)<br>[179; 179]       | 149.0 (0.8)<br>[149; 149]       | 130.0 (2.6)<br>[130; 130]      | 160.0 (0.3)<br>[160; 160]       | 135.9<br>(27)           |
| <b><i>Parent's Highest Prestige</i></b> | 135<br>95.5 (38)<br>[89; 102] | 370<br>104.0 (41)<br>[100; 108] | 269<br>94.3 (38)<br>[90; 99] | 390<br>97.8 (39)<br>[94; 102] | 624<br>94.2 (39)<br>[91; 97] | 569<br>93.7 (40)<br>[90; 97] | 139<br>90.2 (40)<br>[84; 97]  | 675<br>123.5 (45)<br>[120; 127] | 3761<br>100.0 (40)<br>[99; 101] | 1461<br>99.9 (41)<br>[98; 102] | 284<br>105.8 (41)<br>[101; 110] | 8677<br>101.0<br>(41)   |
| <b><i>Father's Prestige</i></b>         | 115<br>92.2 (42)<br>[84; 100] | 313<br>95.5 (44)<br>[91; 100]   | 222<br>86.9 (43)<br>[81; 93] | 323<br>89.4 (42)<br>[85; 94]  | 536<br>85.2 (42)<br>[82; 89] | 480<br>85.3 (43)<br>[81; 89] | 120<br>82.7 (.43)<br>[75; 91] | 583<br>119.0 (48)<br>[115; 123] | 3156<br>91.8 (44)<br>[90; 93]   | 1242<br>93.2 (45)<br>[91; 96]  | 238<br>97.1 (46)<br>[91; 103]   | 7328<br>93.2<br>(44)    |
| <b><i>Mother's Prestige</i></b>         | 102<br>79.3 (32)<br>[73; 86]  | 302<br>89.1 (38)<br>[85; 93]    | 211<br>79.9 (32)<br>[76; 84] | 301<br>85.1 (37)<br>[81; 89]  | 504<br>81.8 (33)<br>[79; 85] | 442<br>84.6 (36)<br>[81; 88] | 106<br>79.3 (30)<br>[73; 85]  | 553<br>104.6 (43)<br>[101; 108] | 2999<br>86.8 (36)<br>[86; 88]   | 1112<br>84.1 (35)<br>[82; 86]  | 230<br>90.5 (37)<br>[86; 95]    | 6862<br>87.0<br>(37)    |

*Note.* *n* = Profile sample size from whole sample. Profile sample size by variable indicated in italics. Means are indicated followed by standard deviation in brackets “( )” Lower and upper confidence intervals indicated in square brackets “[ ]”. Prestige is measured using the Magnitude Prestige scales (MPS: Christoph, 2005)

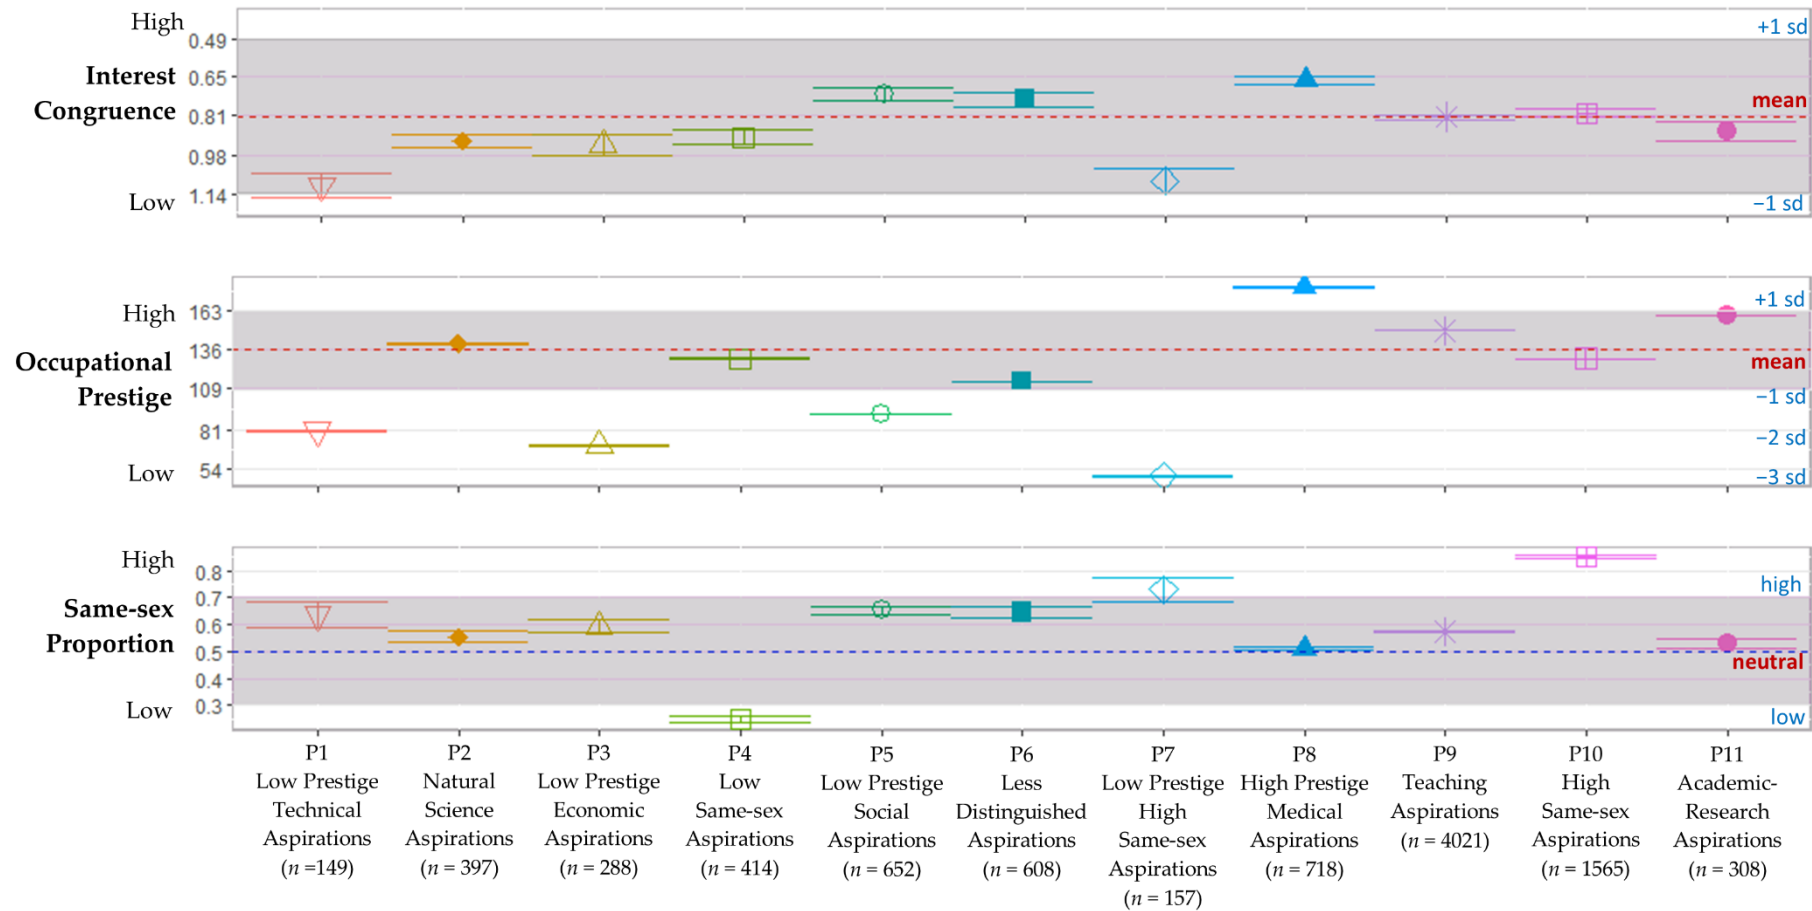

### Career Profile

**Supplementary Figure S1.** The Means and Confidence Intervals of Career Profiles across the three Career Choice Dimensions (Zoomed-in Version). *Note.*  $n=9277$ ; Each dimension is displayed in its original and unstandardized scale. Congruence ranges from 0 (perfect) to ~4 (poor), Prestige ranges from ~20 (low) to ~187 (high), SSP ranges from 0 (low) to 1 (high). Interest congruence is reverse coded so that a higher score correlates with a higher prestige and a higher SSP.

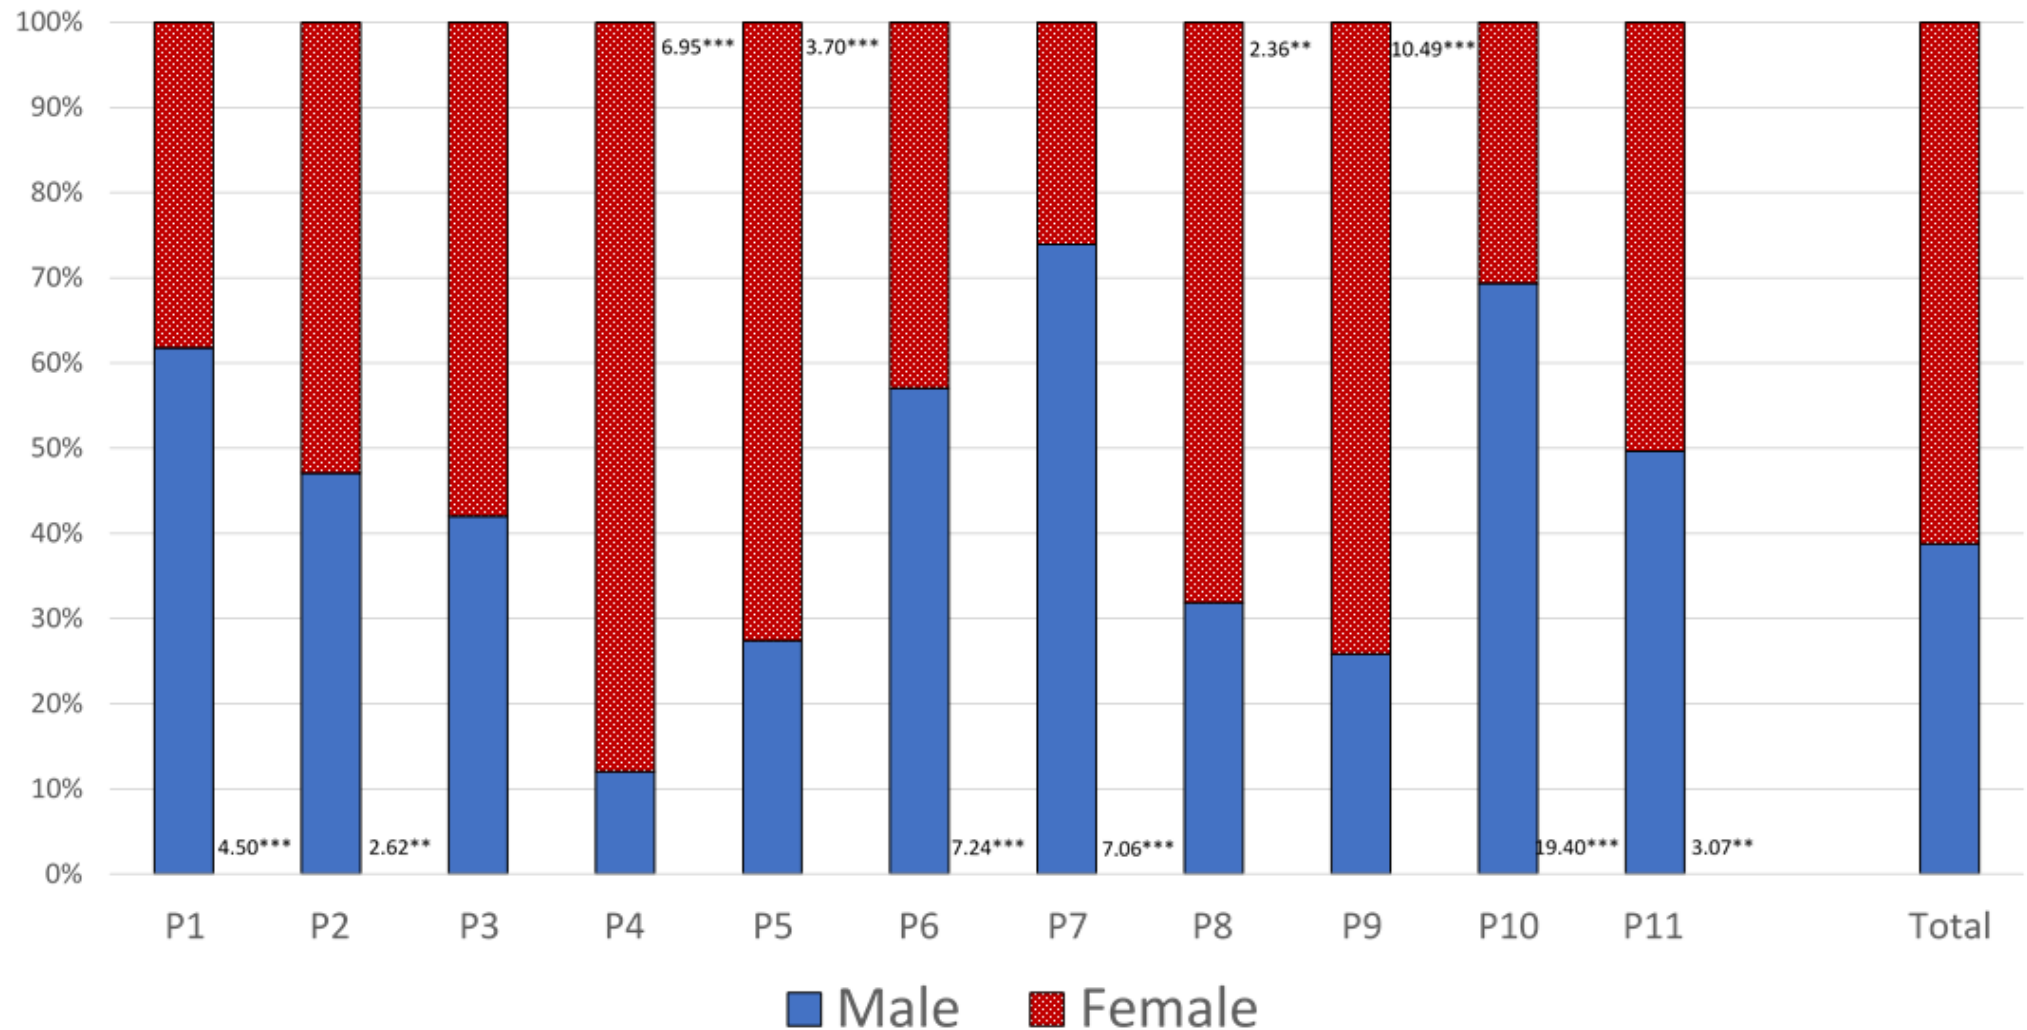

**Supplementary Figure S2.** Bargraph of the Gender Distribution of Career Profiles with Significance based of Chi Square Test Z-scores. *Note.*  $n=9277$ ;  $\chi^2(10) = 1301.216$ ,  $p < .001$ . Contingency Coeff = 0.351, Cramer's V = 0.375; Positive and significant standardized residuals, measured in  $z$ -scores, are indicated adjacent to the corresponding group. Significant standardized residuals are indicated as: \* $p < .05$  if  $z > \pm 1.96$ ; \*\* $p < .01$  if  $z > \pm 2.58$ ; \*\*\* $p < .001$  if  $z > \pm 3.29$ .

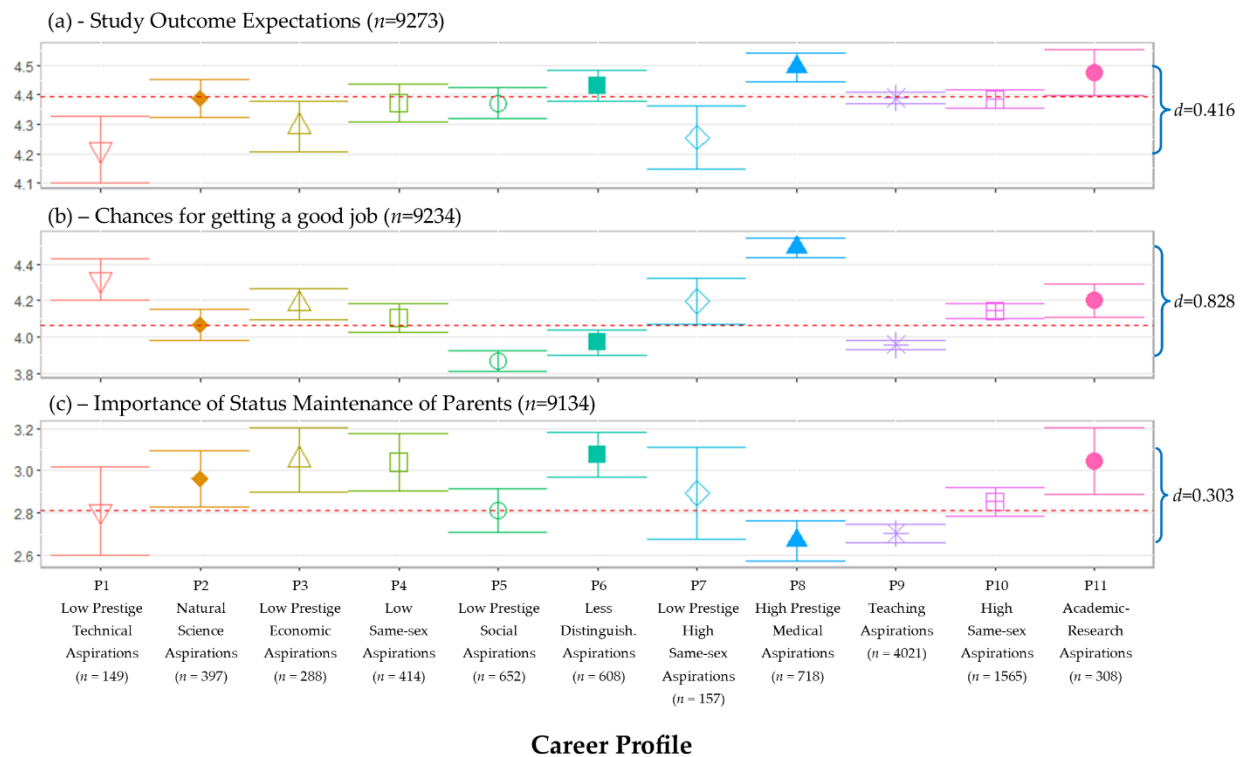

**Supplementary Figure S3:** Variables for the Validation of the Compromise Profiles (Zoomed-in Version). *Note.* Sample sizes vary according to availability in the NEPS dataset. Sample means are illustrated as the dotted red line. The effect size (Cohen's  $d$ ) is illustrate the range between the highest vs. the lowest mean score across the career profiles for each variable. For the full-scale version see Figure 3.

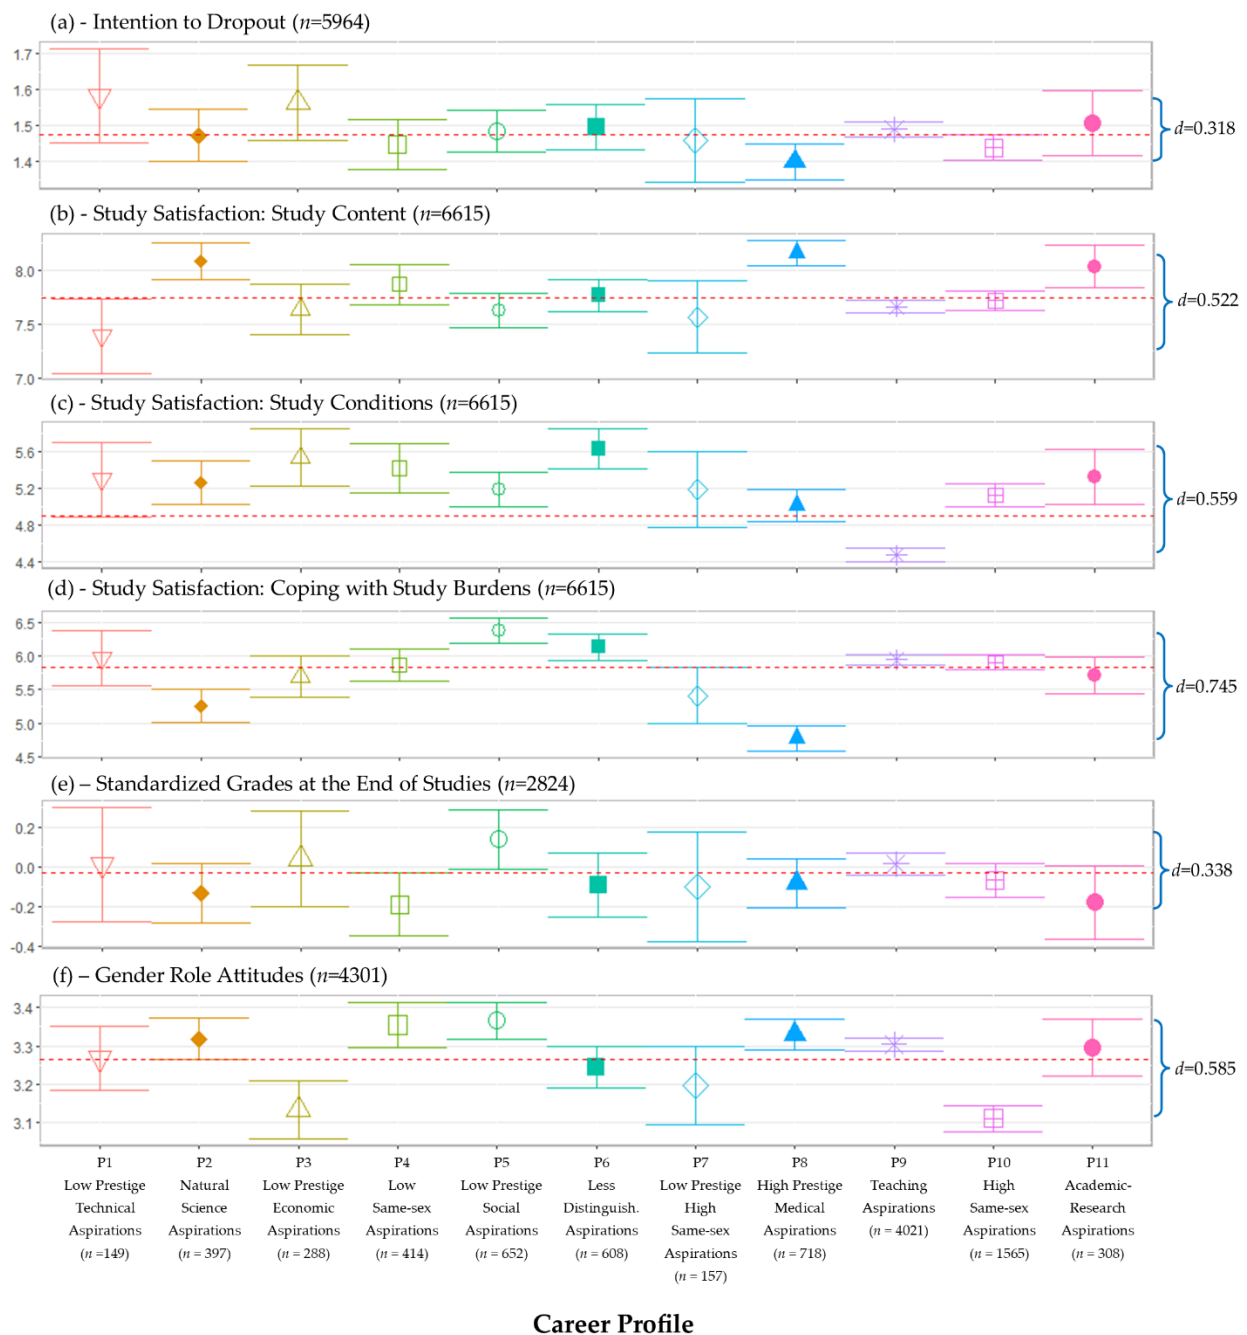

**Supplementary Figure S4:** Variables for the Validation of the Compromise Profiles (Zoomed-in Version). *Note.* Sample sizes vary according to availability in the NEPS dataset. Sample means are illustrated as the dotted red line. The effect size (Cohen's  $d$ ) is illustrate the range between the highest vs. the lowest mean score across the career profiles for each variable. For the full-scale version see Figure 5.

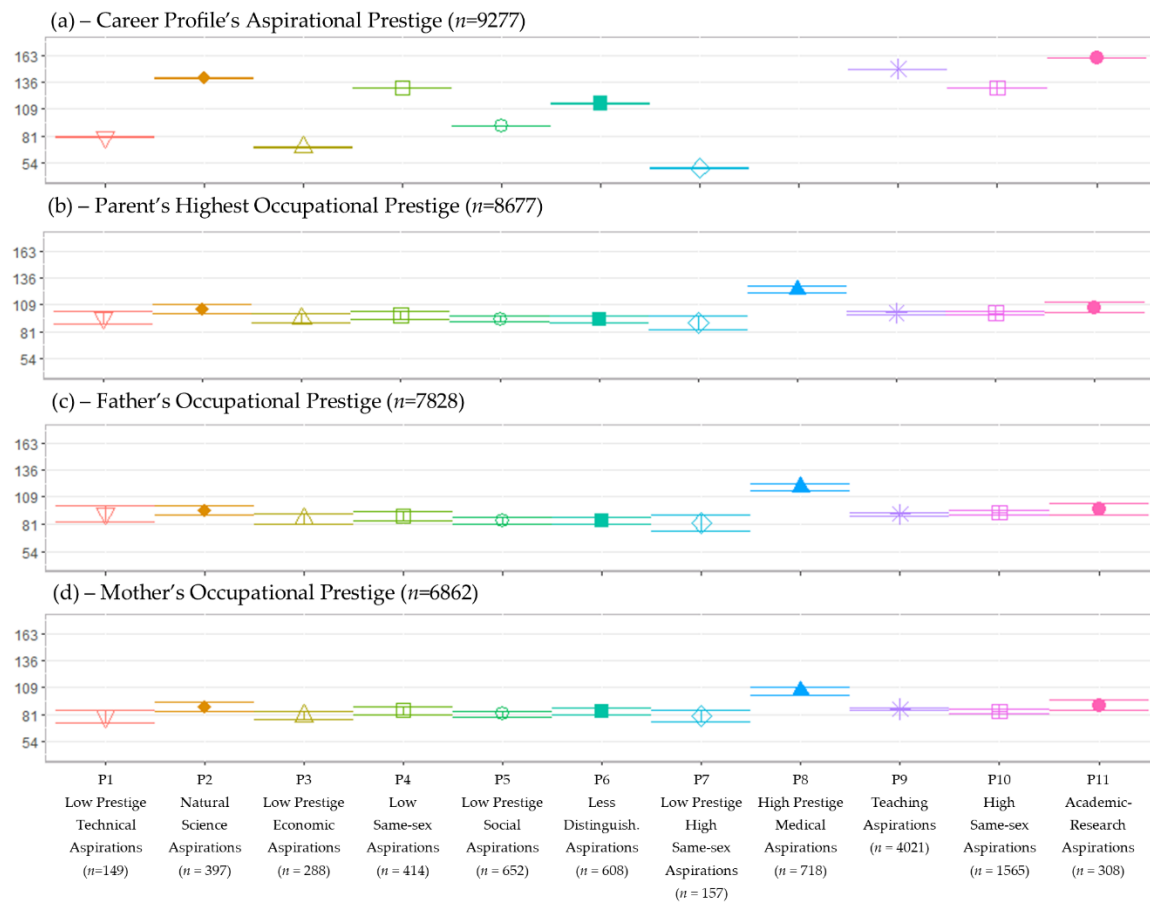

### Career Profile

**Supplementary Figure S5:** Comparison of Career Profile's Occupational Prestige with Parents. *Note.* Sample sizes vary according to availability in the NEPS dataset. Prestige is measured using the Magnitude Prestige scales (MPS: Christoph, 2005)



## Supplementary Reference list

- Athenstaedt, U. (2000). Normative Geschlechtsrollenorientierung: Entwicklung und Validierung eines Fragebogens. *Zeitschrift für Differentielle und Diagnostische Psychologie*, 21(1), 91-104.
- Christoph, B. (2005): Zur Messung des Berufsprestiges. Aktualisierung der Magnitude-Prestigeskala auf die Berufsklassifikation ISCO88. In *ZUMA Nachrichten* 29 (57), pp.79–127. Available at: <https://nbn-resolving.org/urn:nbn:de:0168-ssoar-207543>
- Deutsches Jugendinstitut (DJI), München; Technische Universität Chemnitz-Zwickau, (2001). *DJI Foreigner Survey - Young People*. GESIS Data Archive, Cologne. ZA3371 Data file Version 1.0.0. <http://doi.org/10.4232/1.3371>
- Ertl, B., Hartmann, F. G., & Wunderlich, A. (2022). Impact of interest congruence on study outcomes. *Frontiers in Psychology*, 13. <https://www.frontiersin.org/article/10.3389/fpsyg.2022.816620>
- Ertl, B., & Hartmann, F. G. (2019). The interest profiles and interest congruence of male and female students in STEM and non-STEM fields. *Frontiers in Psychology*, 10. <https://doi.org/10.3389/fpsyg.2019.00897>
- Esser, H. & Stocké, V. (2003). Forschungsprojekt "Bildungsaspirationen, Bezugsgruppen und Bildungsentscheidungen" (Mannheimer Bildungspanel)
- Holland, J. L. (1997). *Making vocational choices. A theory of vocational personalities and work environments* (3rd ed.). Psychological Assessment Resources.
- Stocké, V. (2005): Statuserhaltungsmotiv. *ZIS - GESIS Leibniz Institute for the Social Sciences* <https://doi.org/10.6102/zis148>
- Trautwein, U., Köller, O., & Watermann, R. (2004). Transformation des Sekundarschulsystems und akademische Karrieren—Zusammenfassung, Diskussion und ein Ausblick [Transformation of the secondary school system and academic careers— Summary, discussion and outlook]. In *Wege zur Hochschulreife in Baden-Württemberg* (pp. 451–471). VS Verlag für Sozialwissenschaften. [https://doi.org/10.1007/978-3-322-80906-3\\_13](https://doi.org/10.1007/978-3-322-80906-3_13)
- Westermann, R., Heise, E., Spies, K. & Trautwein, U. (1996). Identifikation und Erfassung von Komponenten der Studienzufriedenheit. *Psychologie in Erziehung und Unterricht*, 43(1), 1-2
